# Supplementary material for: Alternative intermediates for glycerol valorization: iridium-catalyzed formation of acetals and ketals
Source: Royal Society of Chemistry journal article supplement (doi:10.1039/c0gc00096e), 2010-01-01

$^{13}\text{C}$  NMR of crude products of glycerol acetalization with acetone

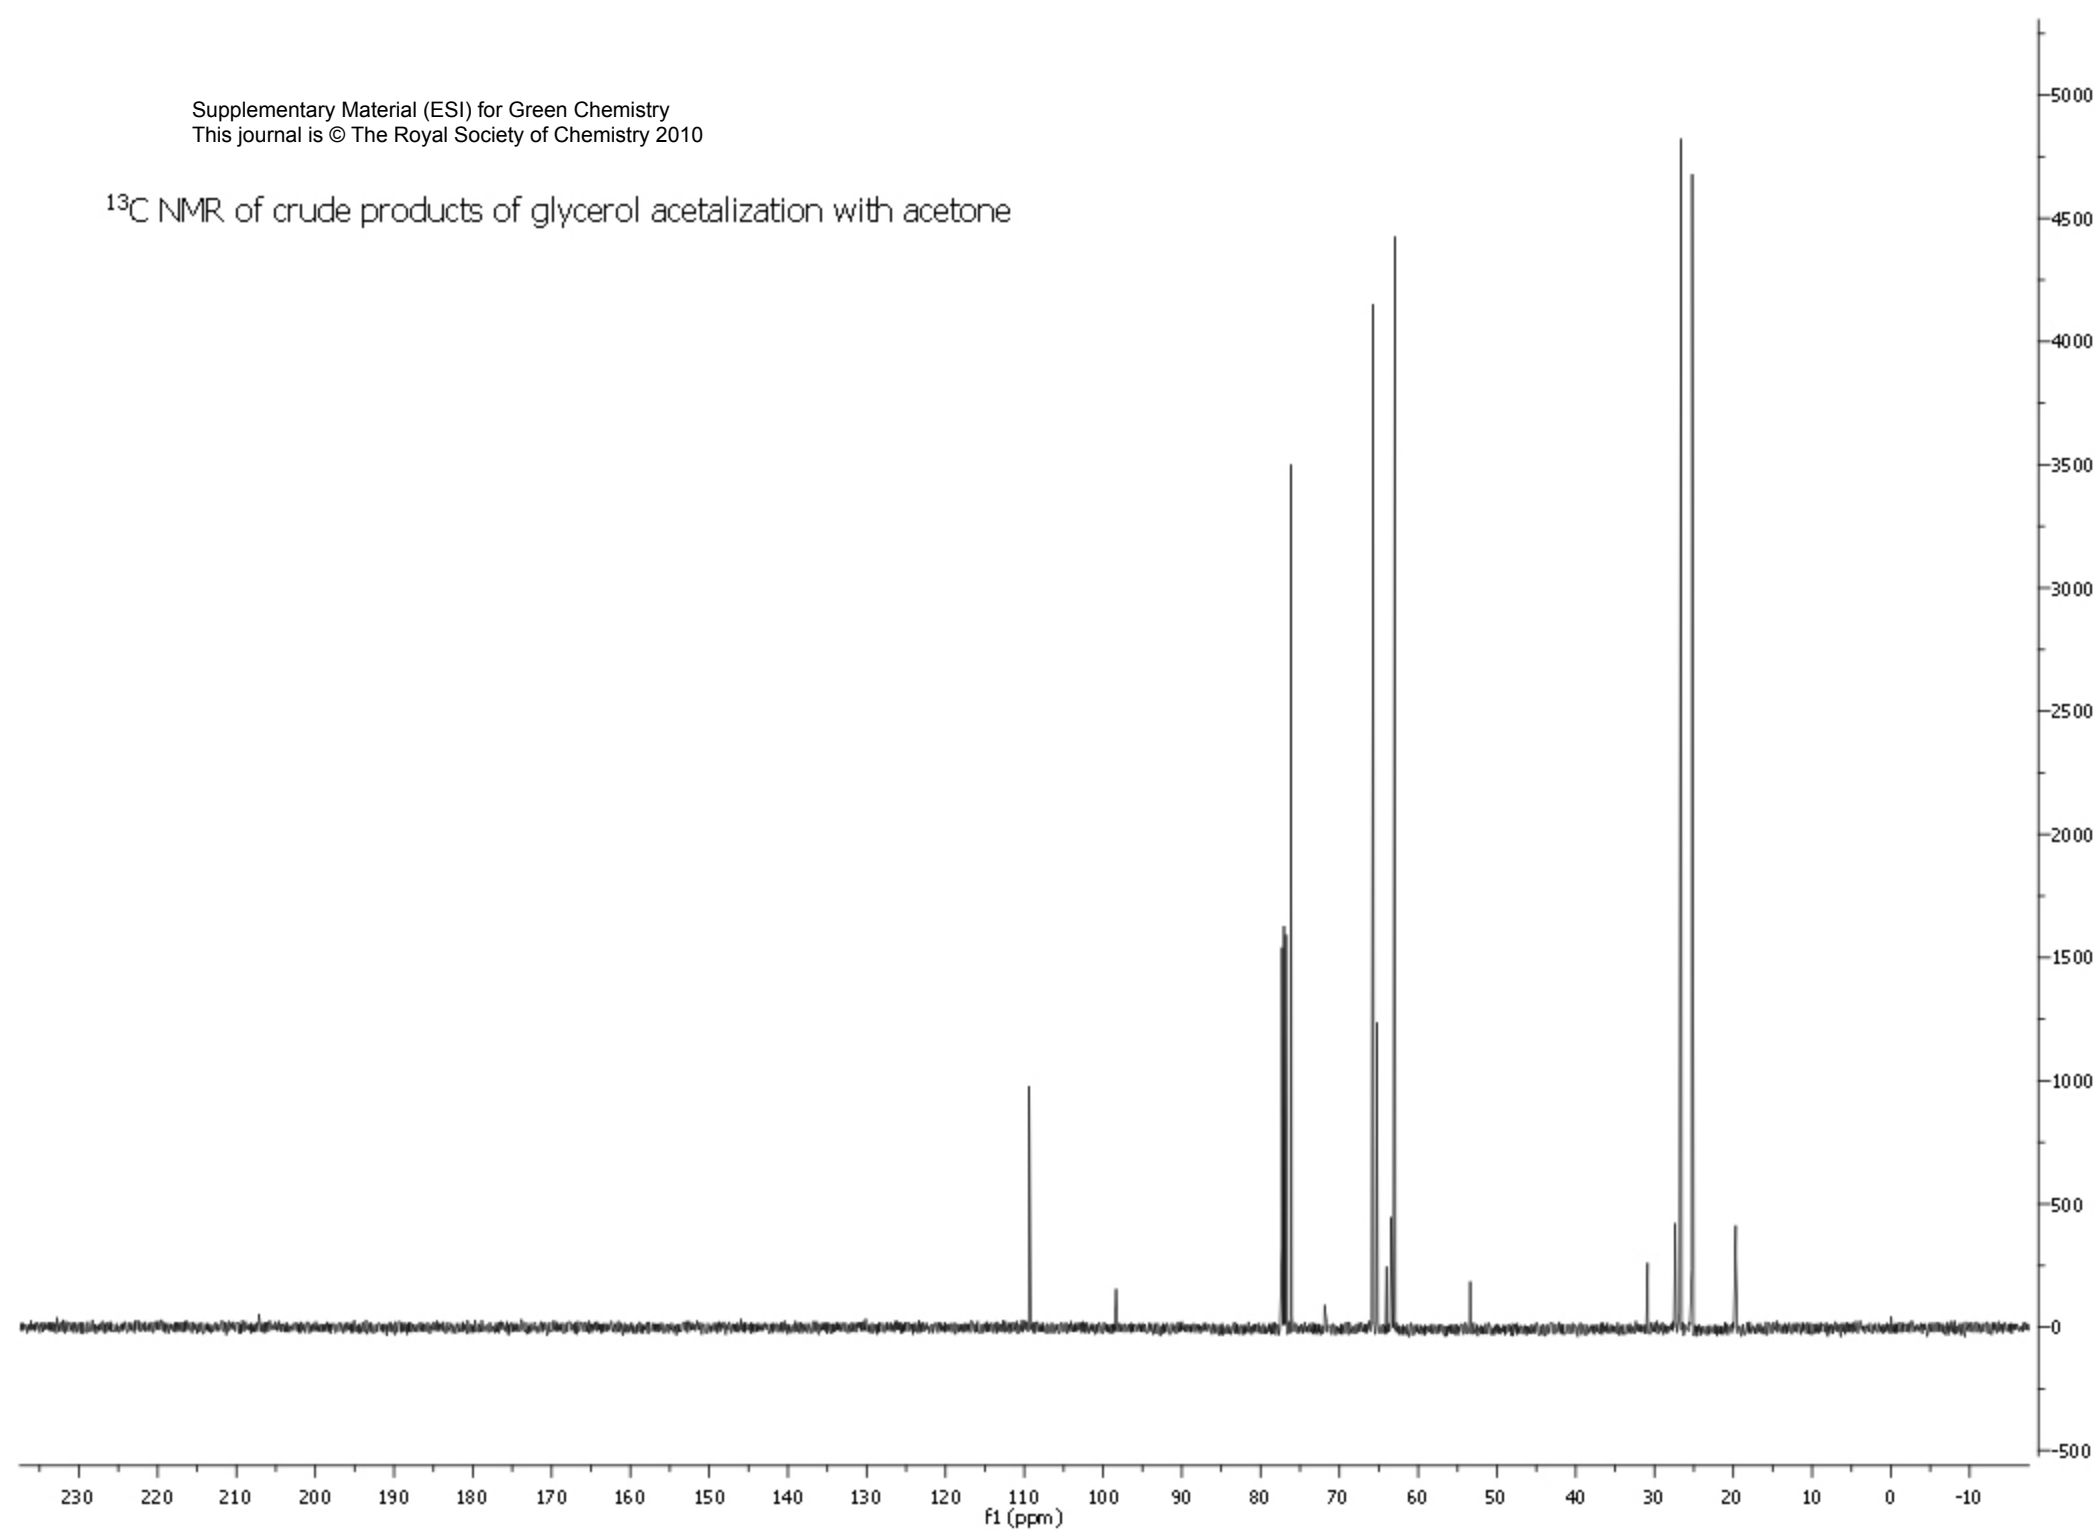

$^{13}\text{C}$  NMR of crude products of glycerol acetalization with acetophenone

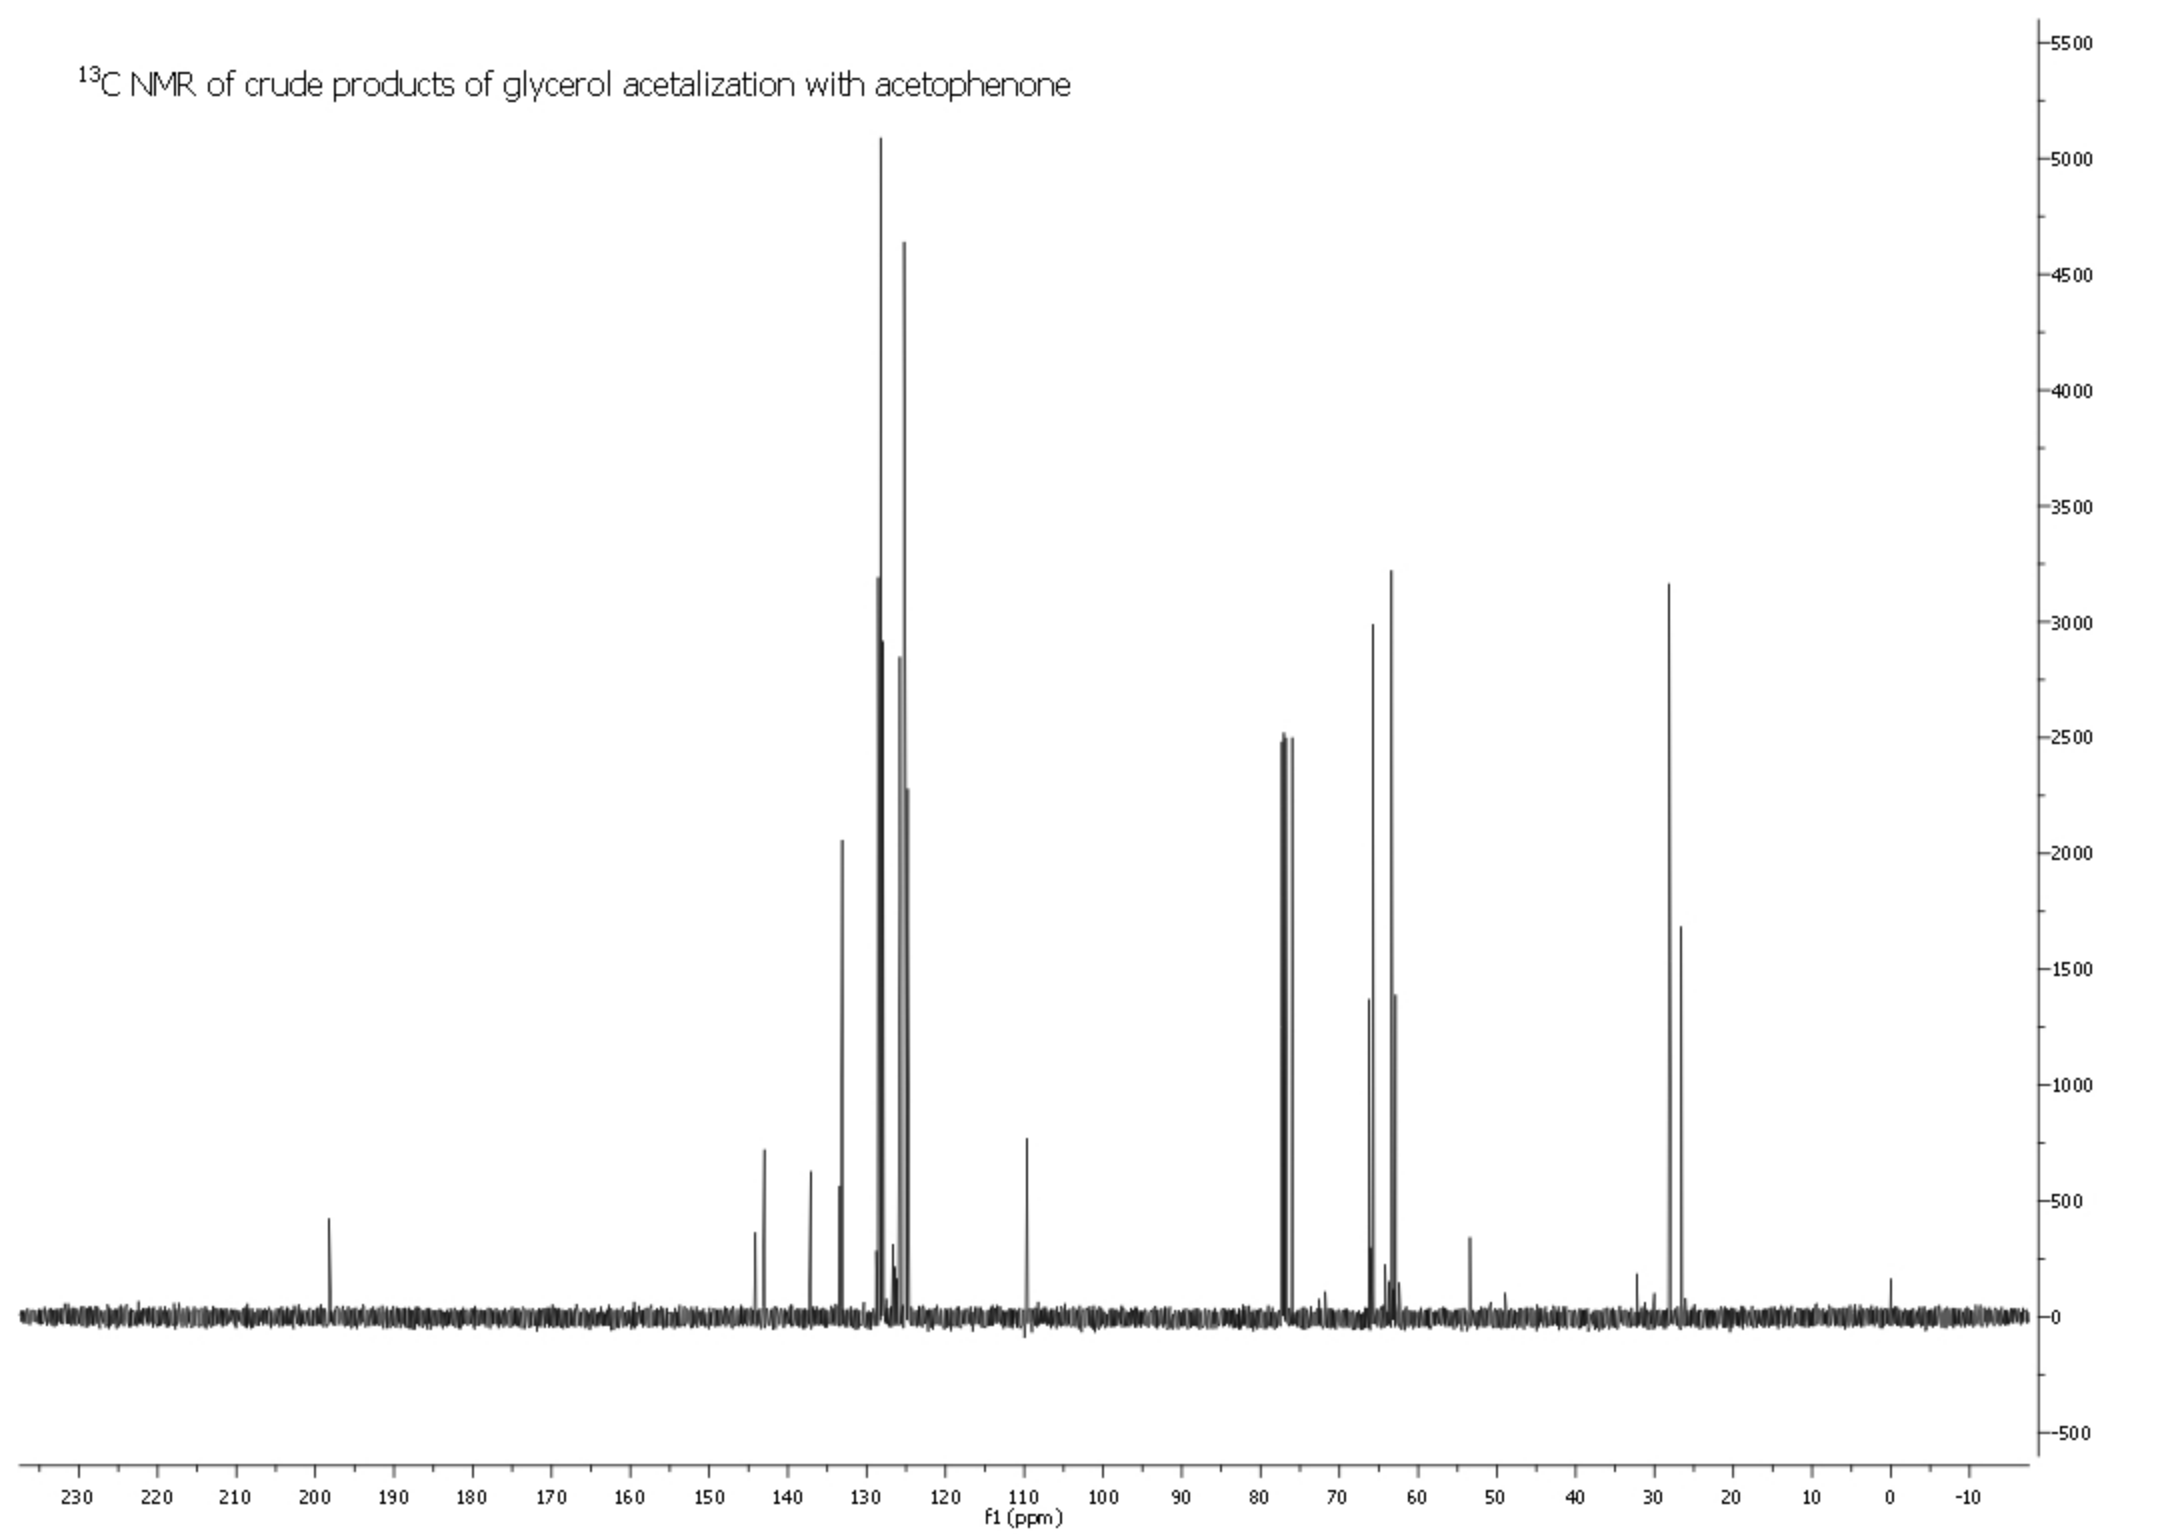

$^{13}\text{C}$  NMR of crude products of glycerol acetalization with benzaldehyde

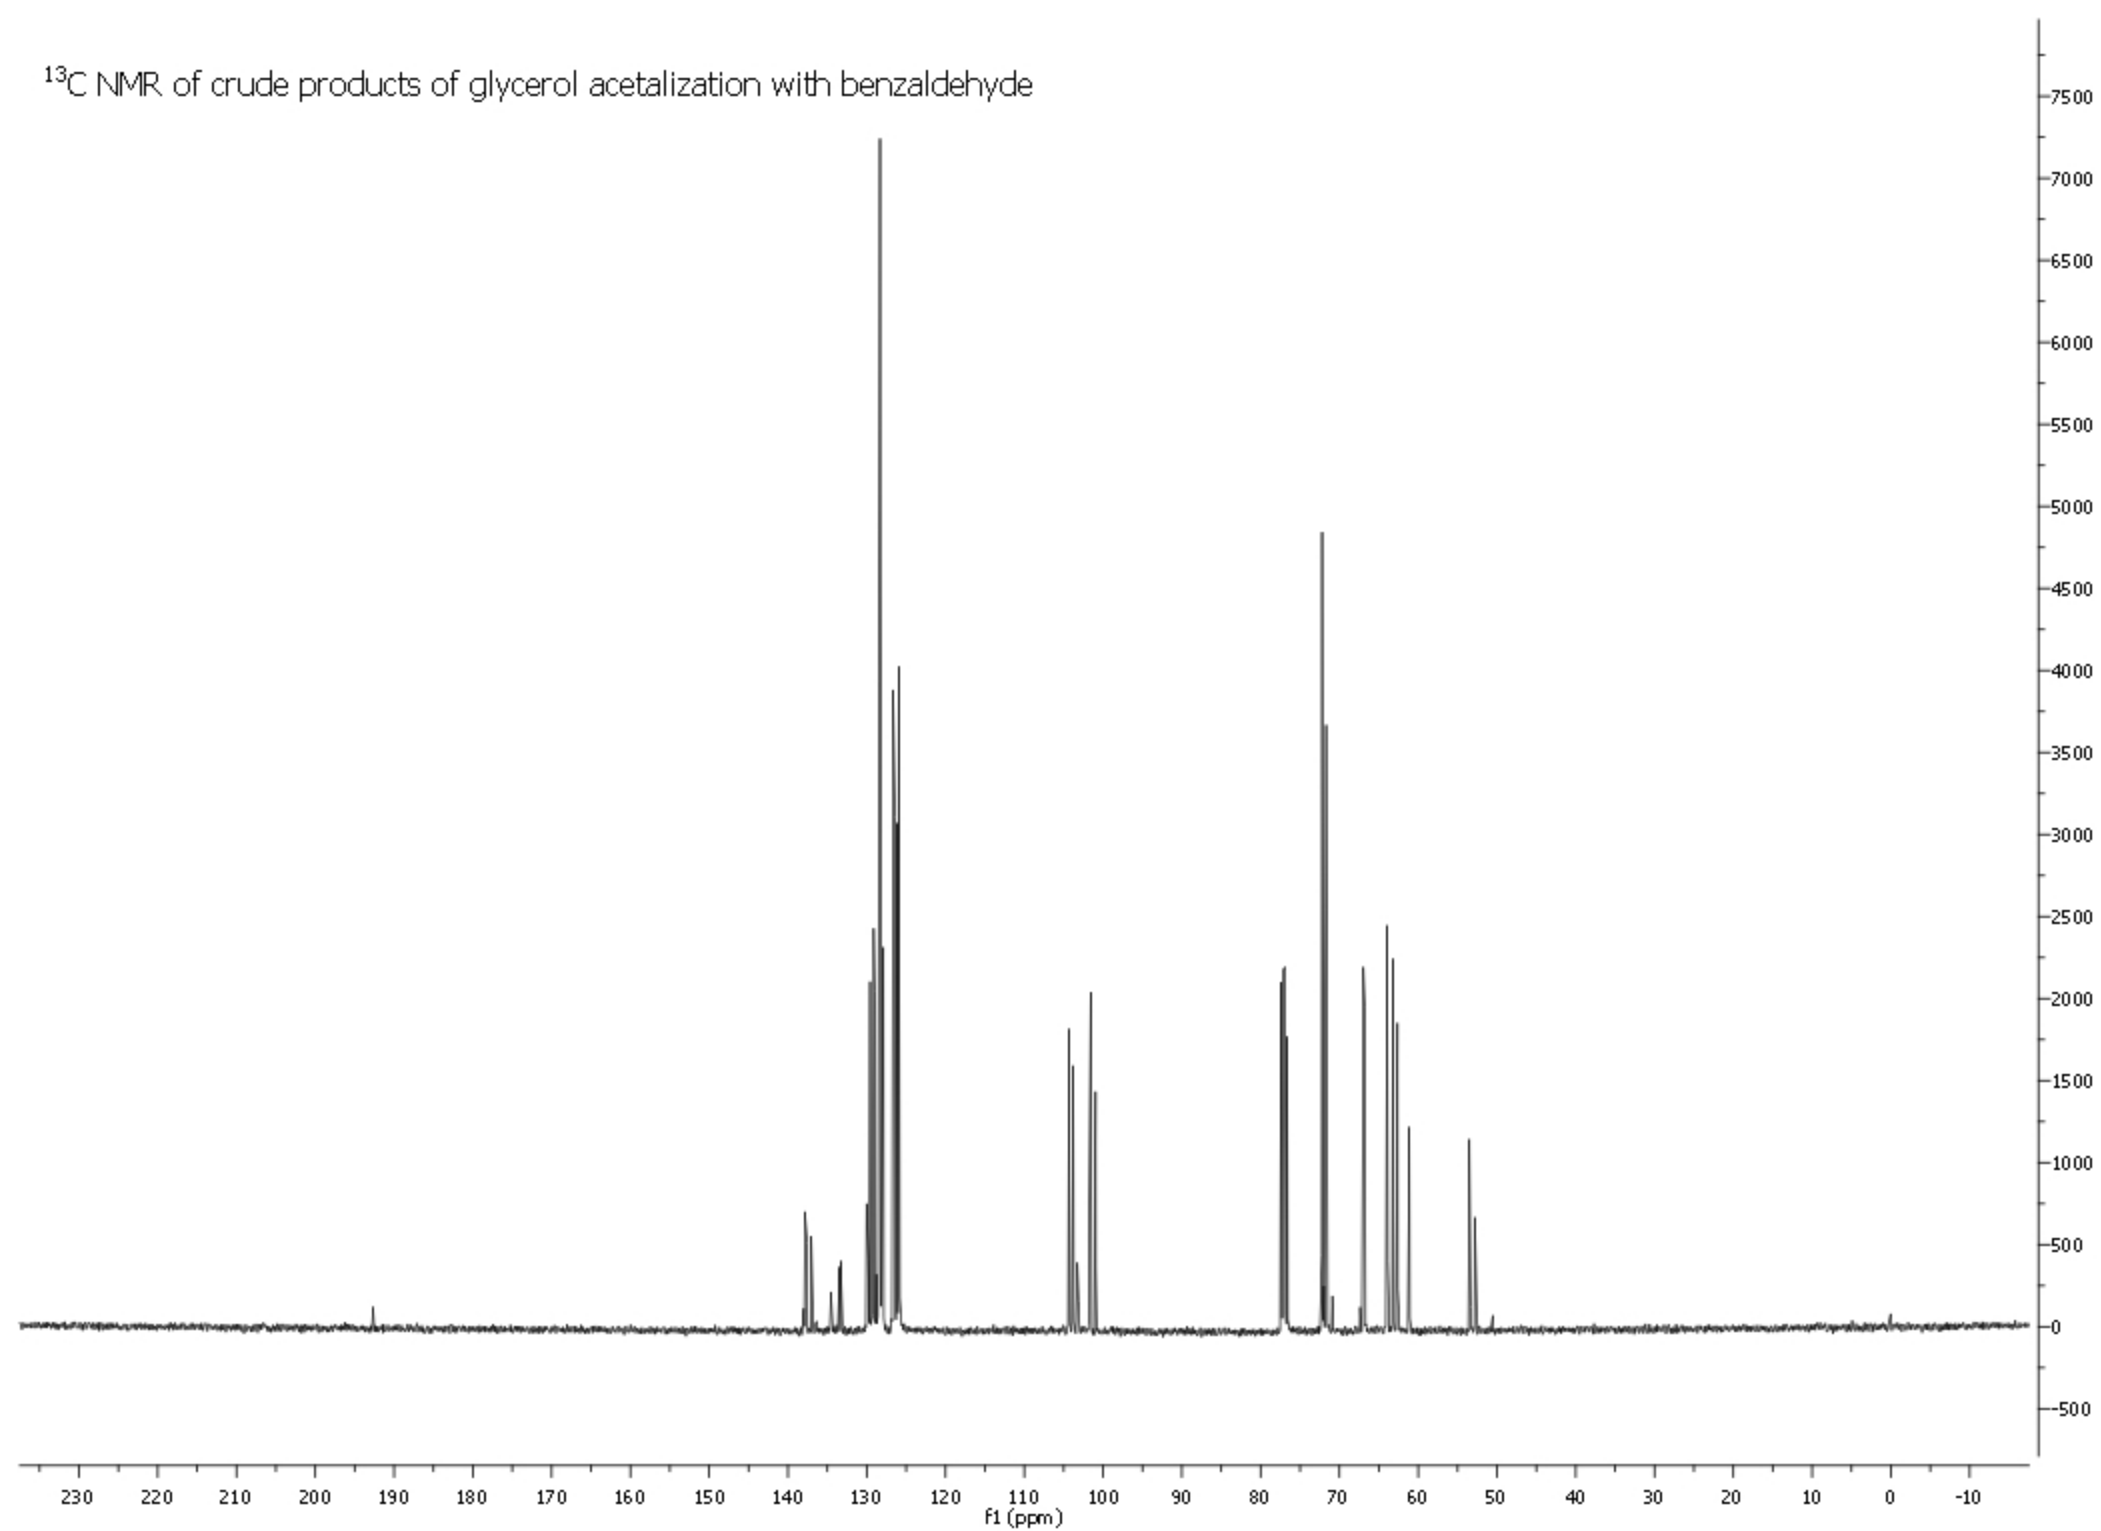

$^{13}\text{C}$  NMR of crude products of glycerol acetalization with cyclohexanone

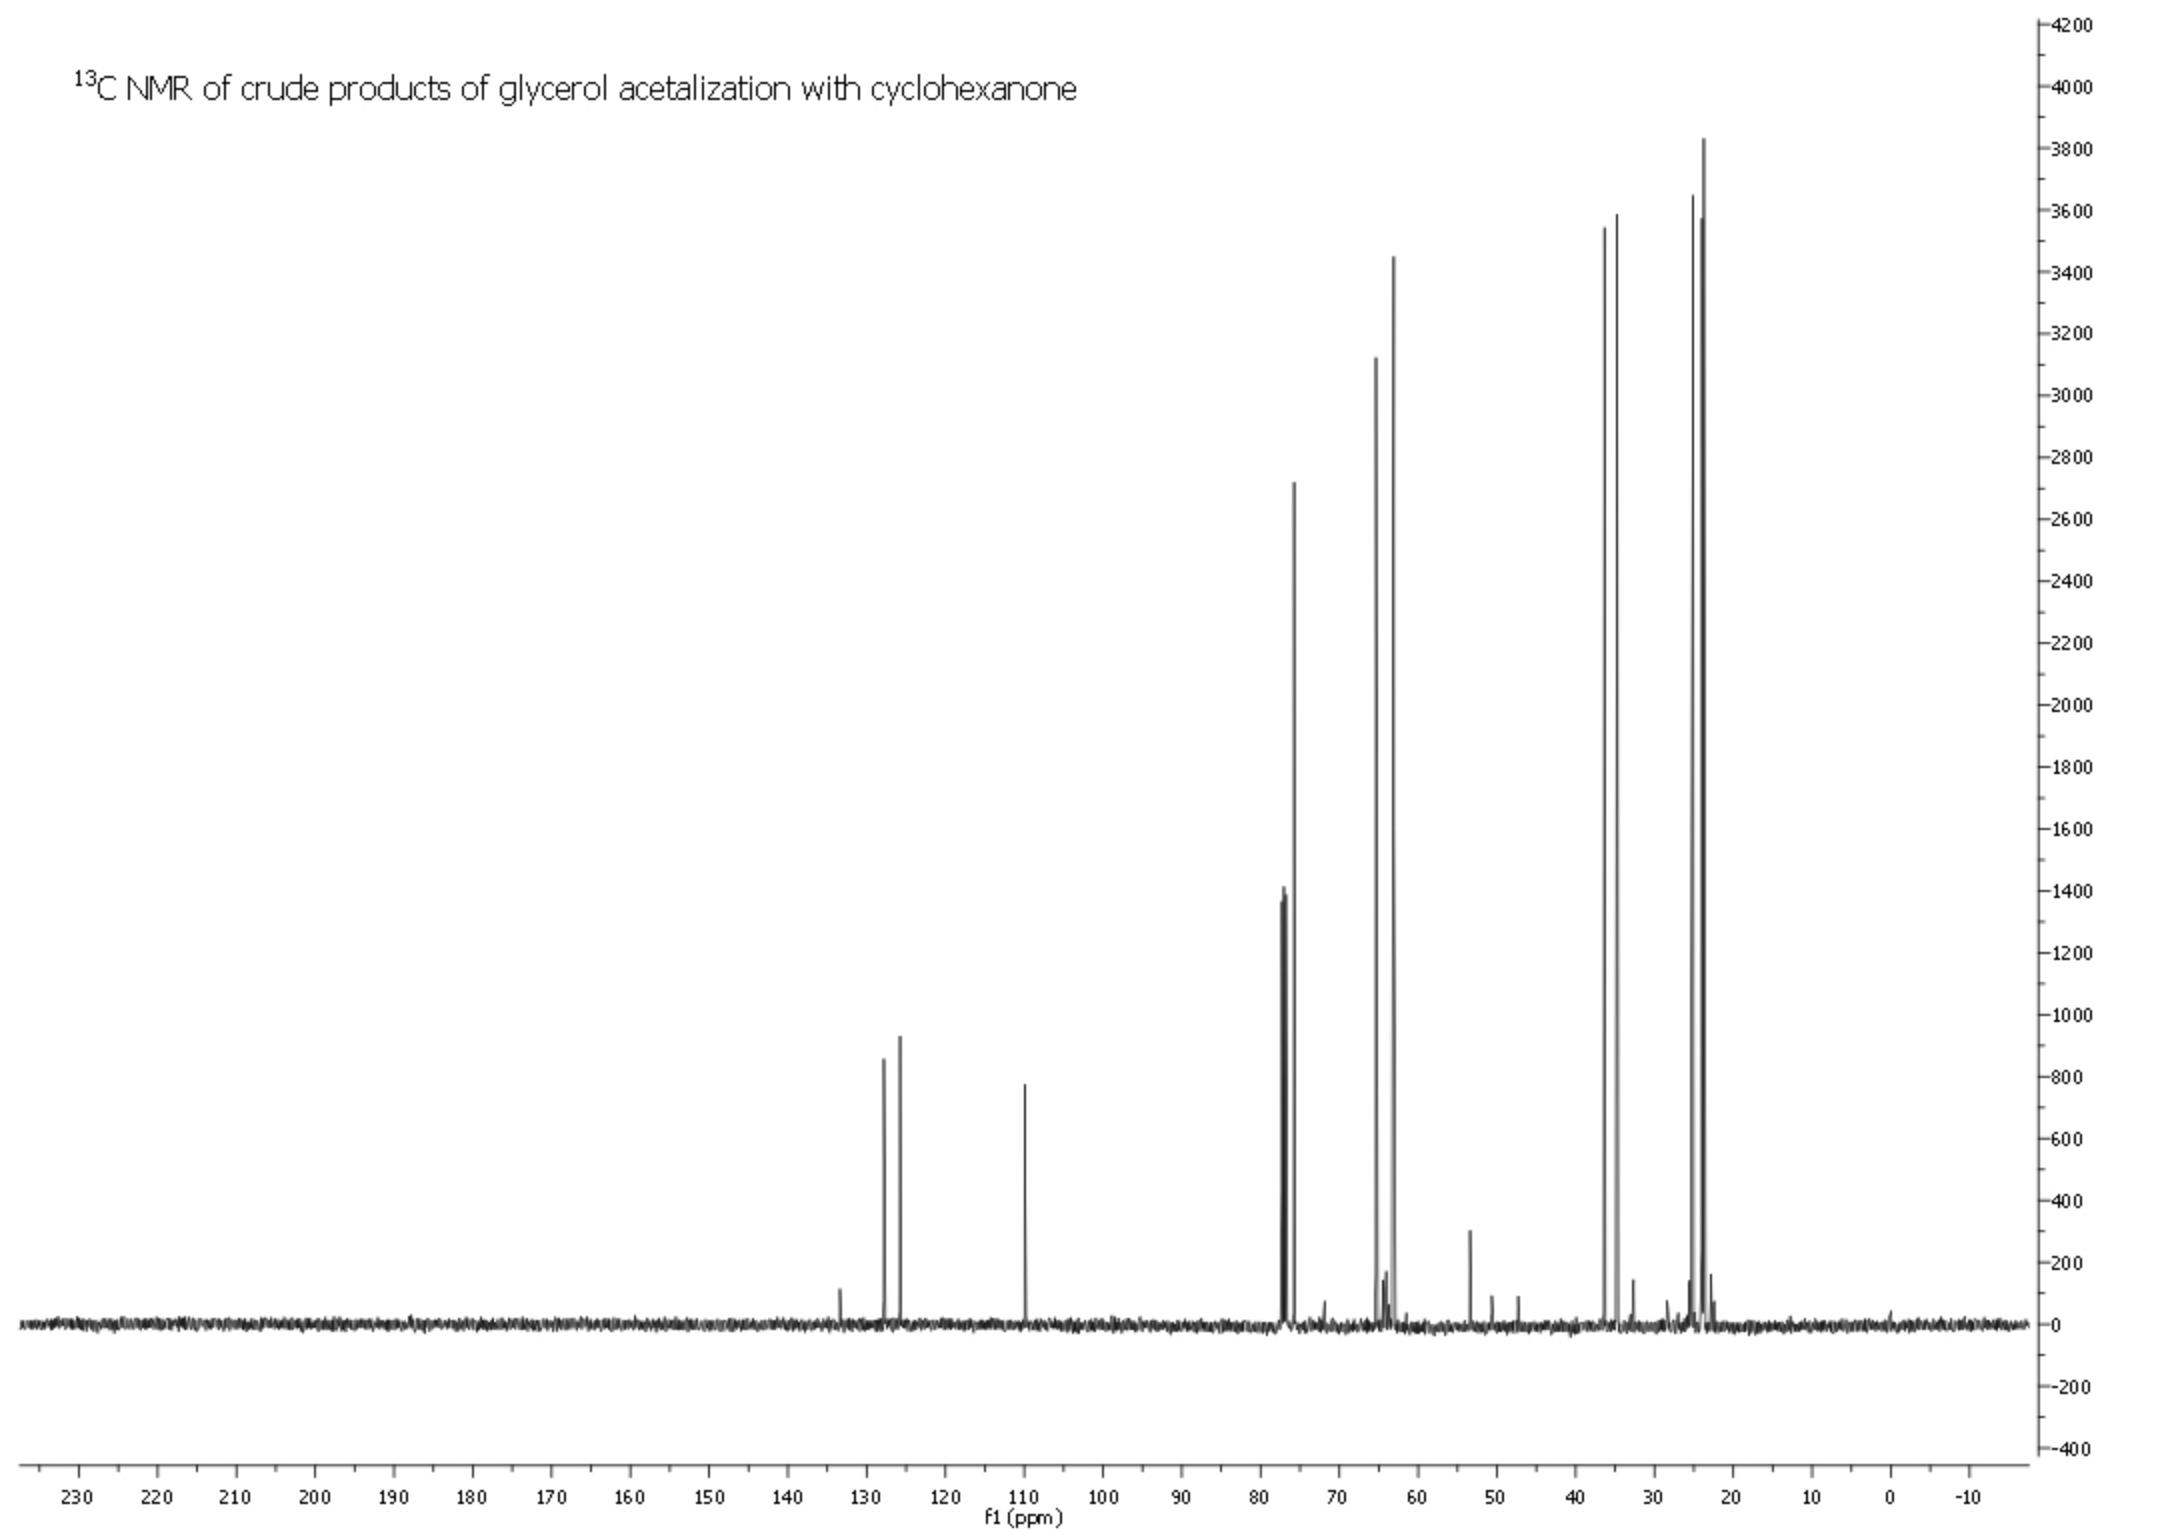

$^{13}\text{C}$  NMR of crude products of glycerol acetalization with diisopropylacetone

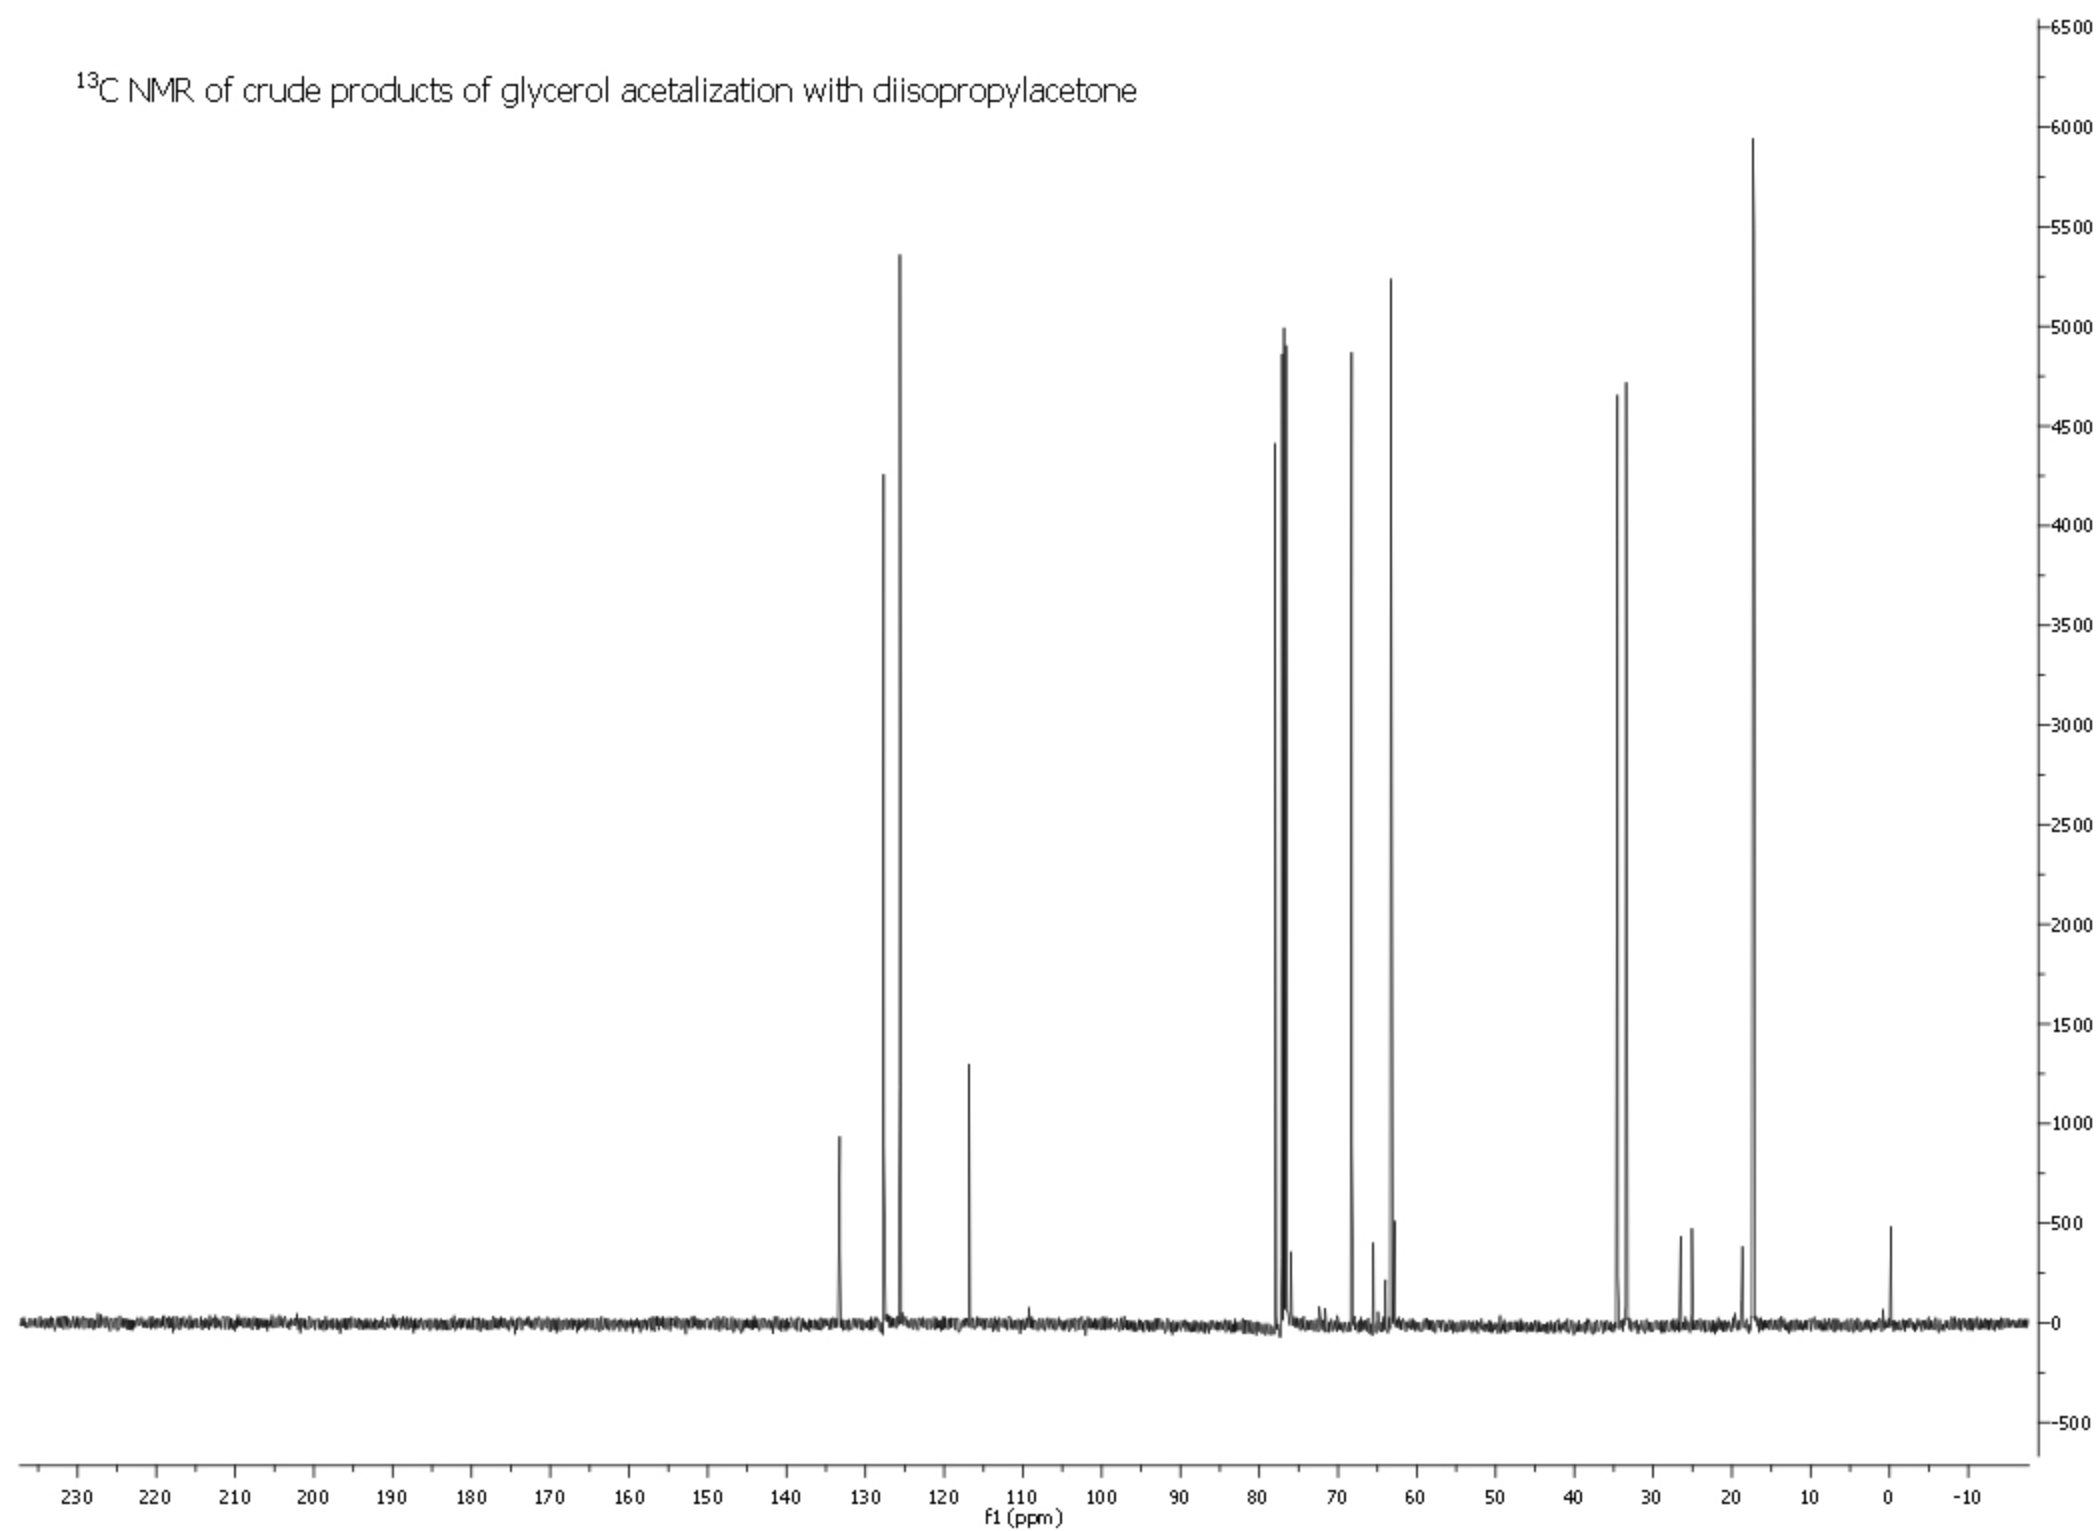

$^{13}\text{C}$  NMR of crude products of glycerol acetalization with octanal

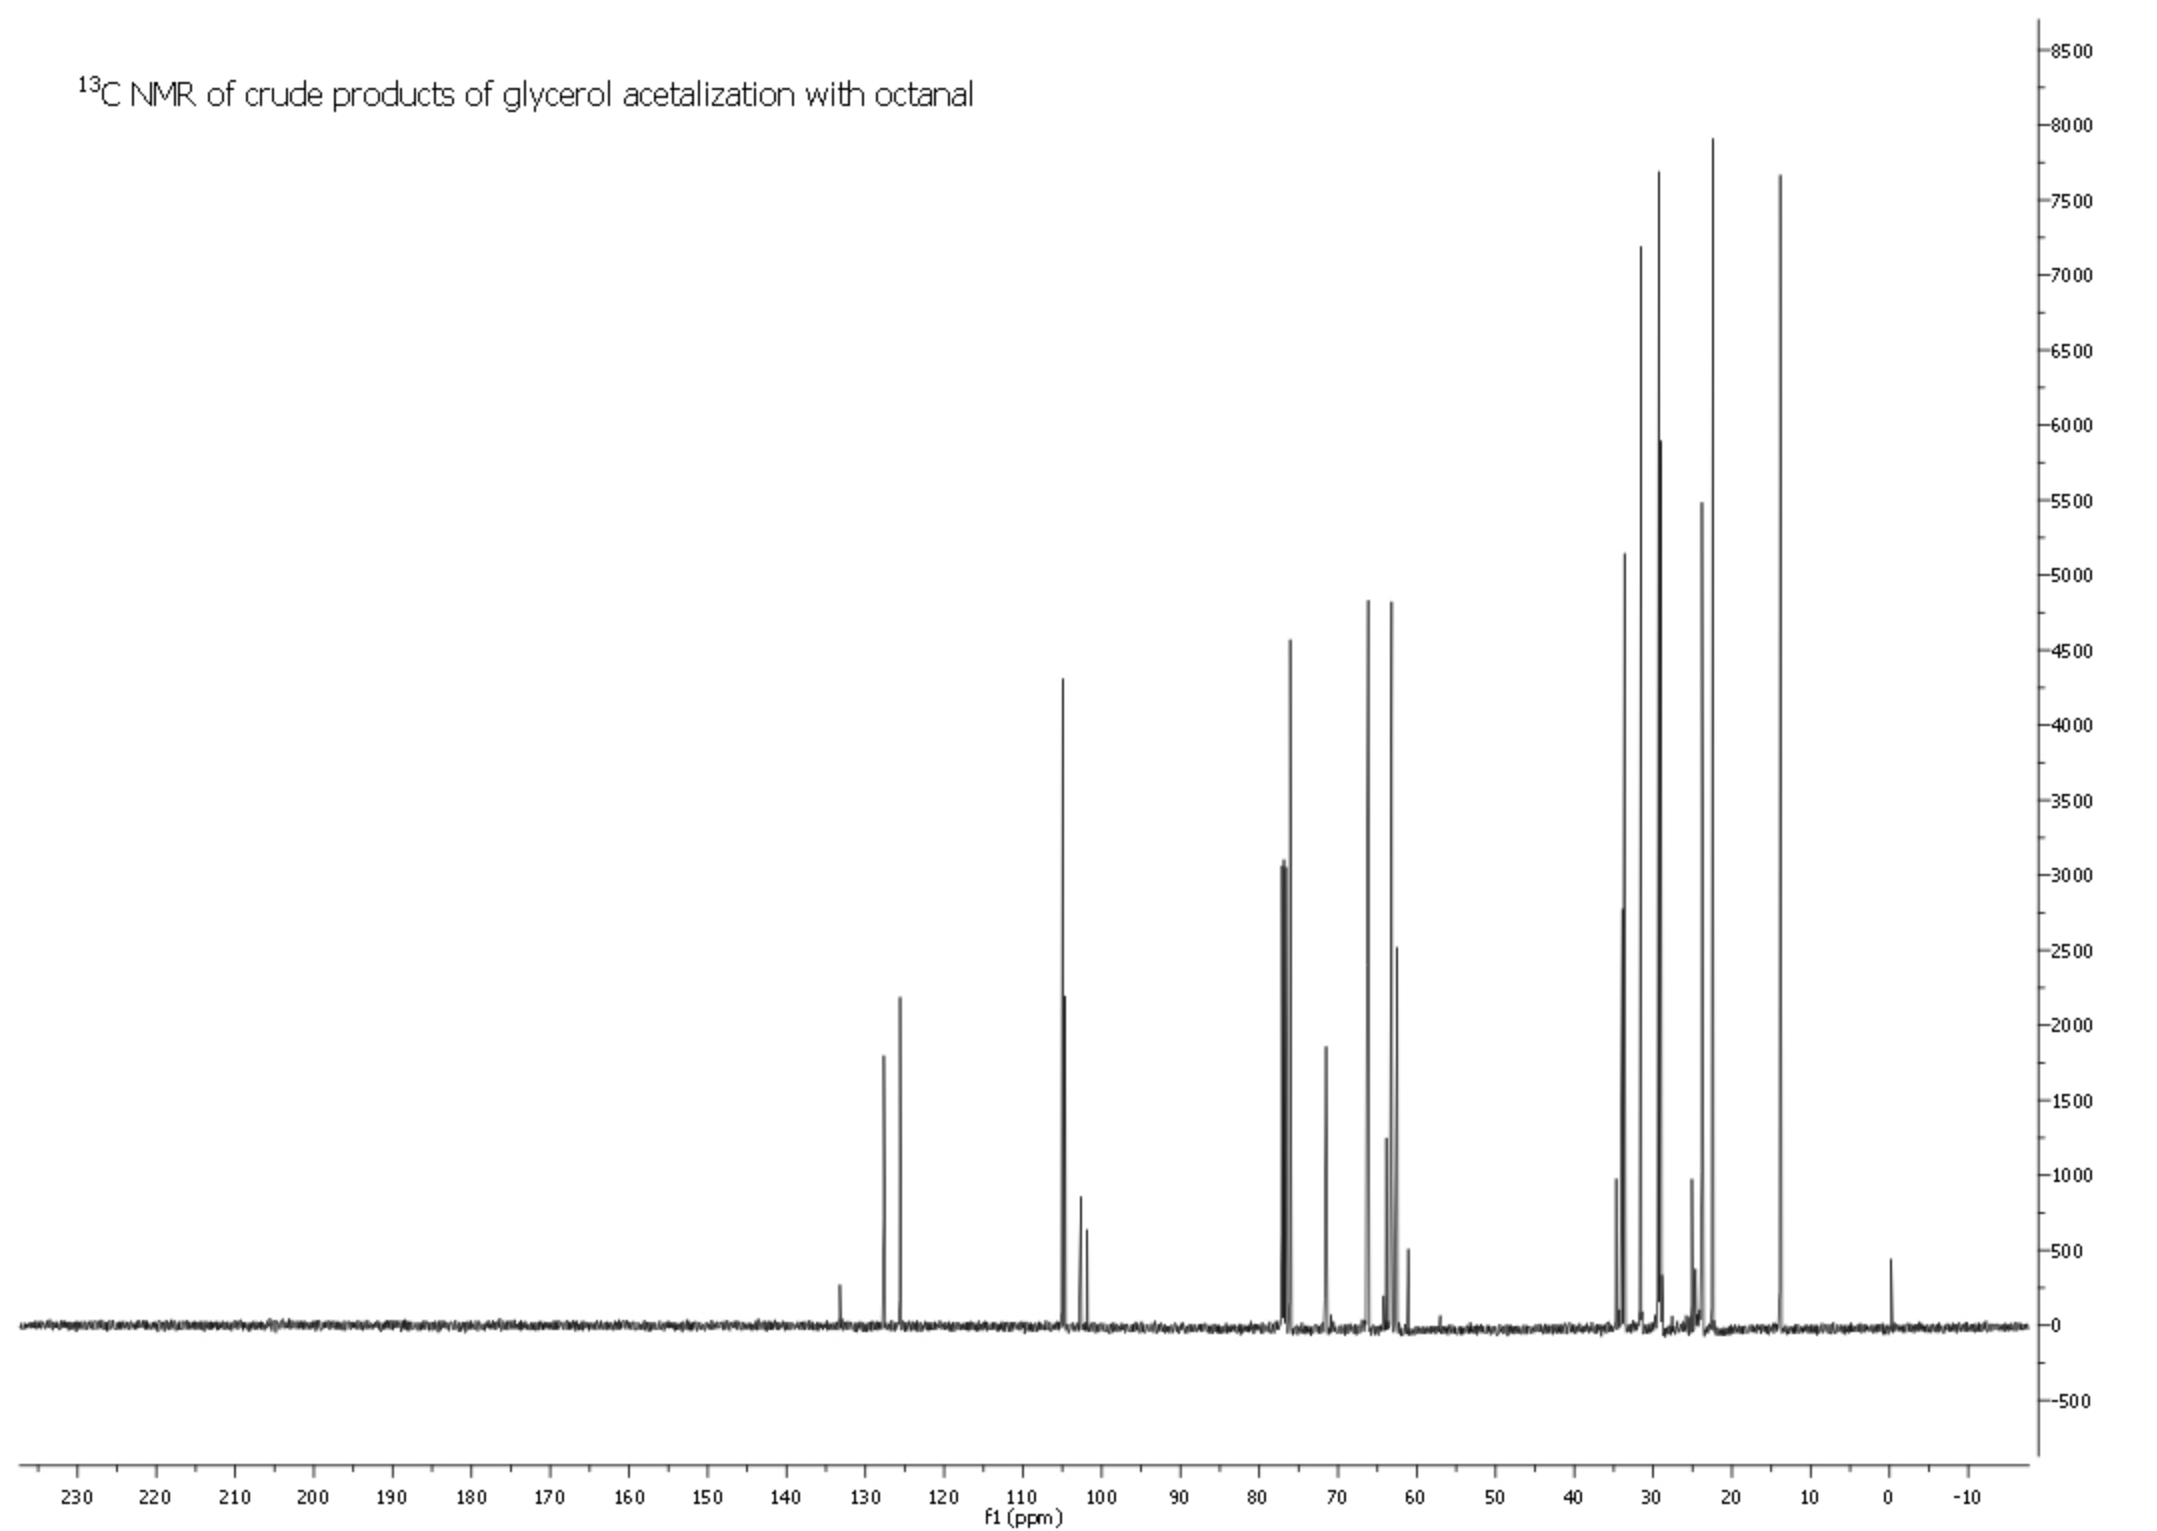

$^1\text{H}$  NMR of crude products of glycerol acetalization with acetone

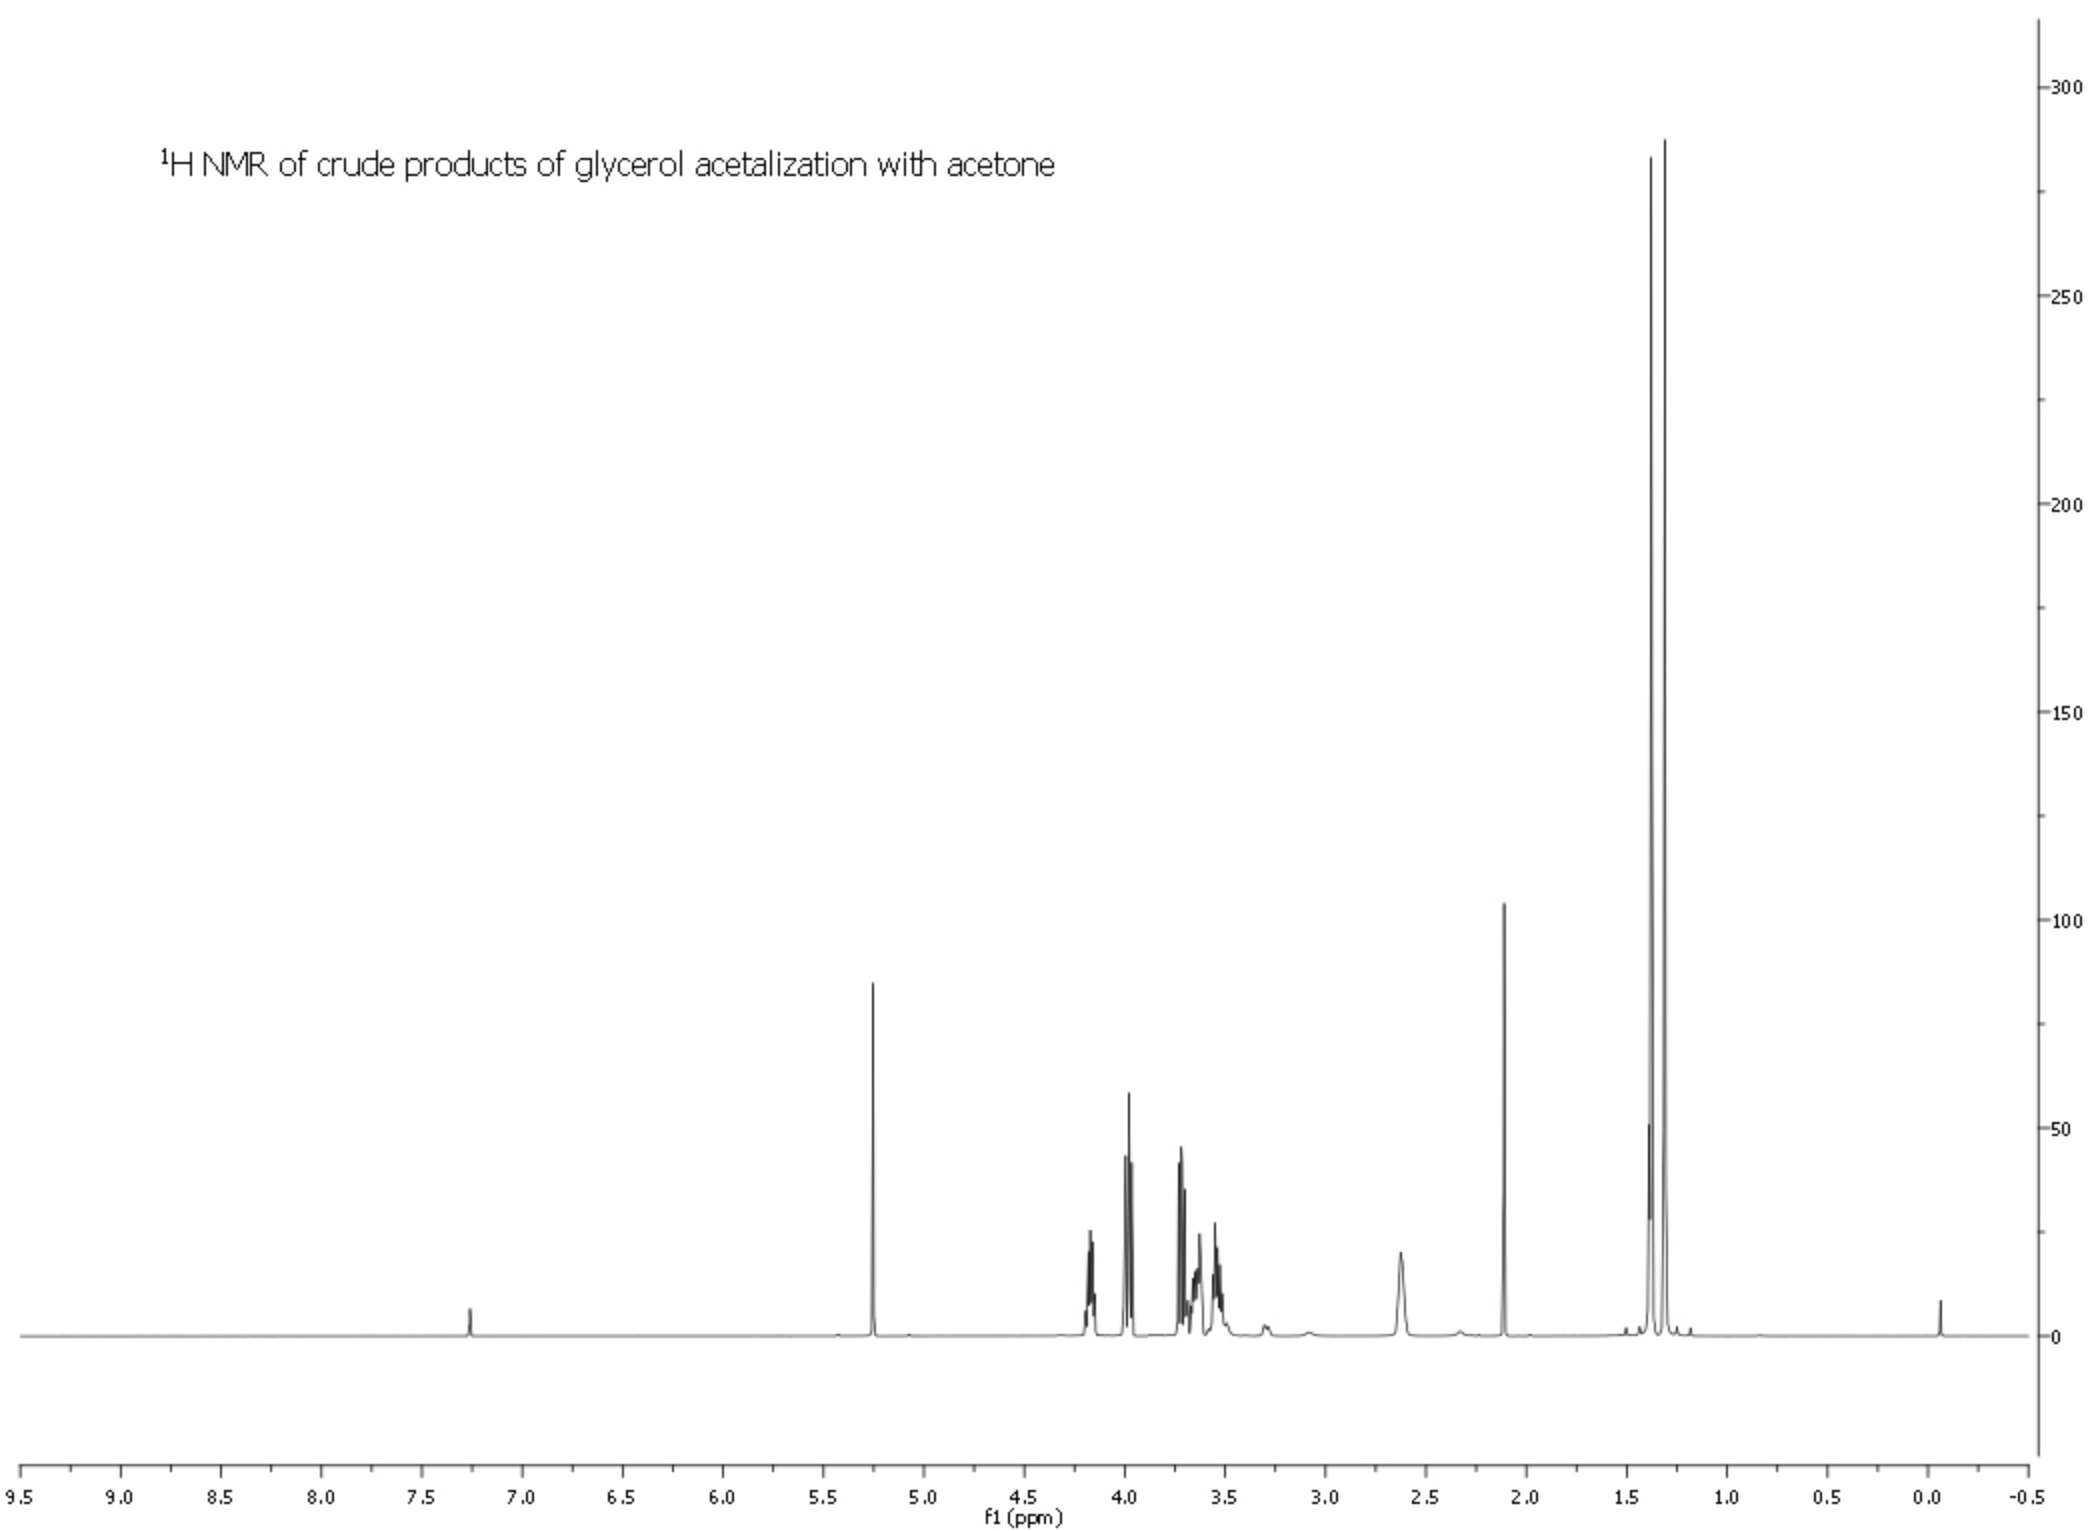

$^1\text{H}$  NMR of crude products of glycerol acetalization with acetophenone

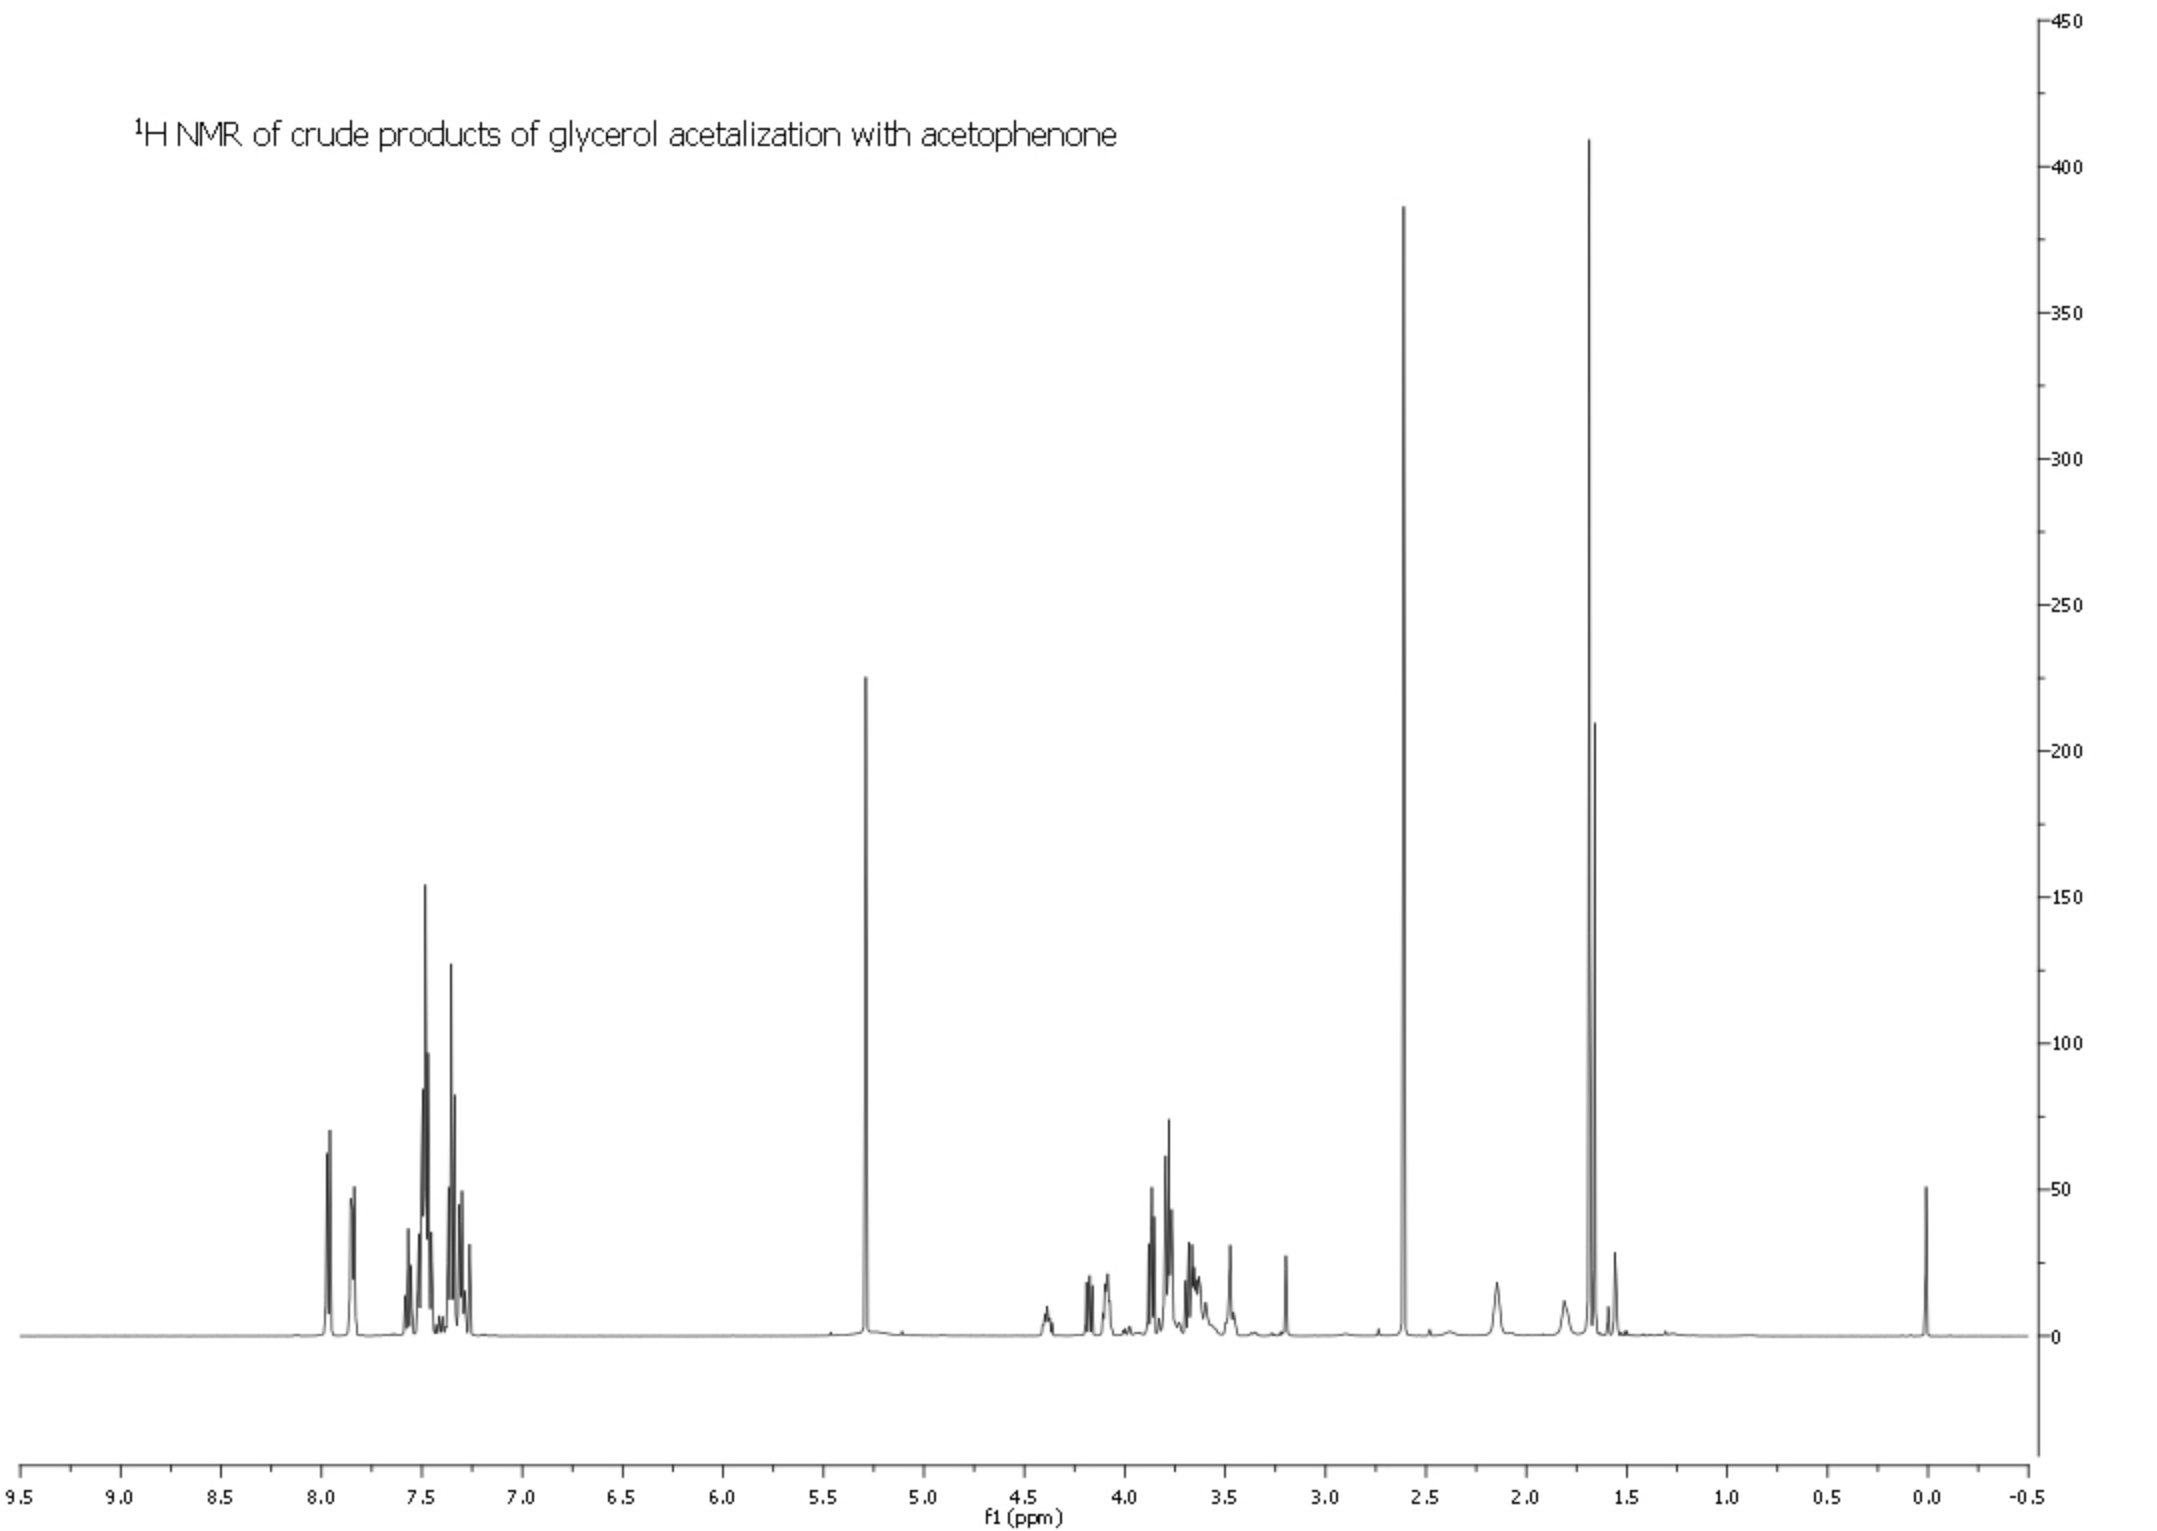

$^1\text{H}$  NMR of crude products of glycerol acetalization with benzaldehyde

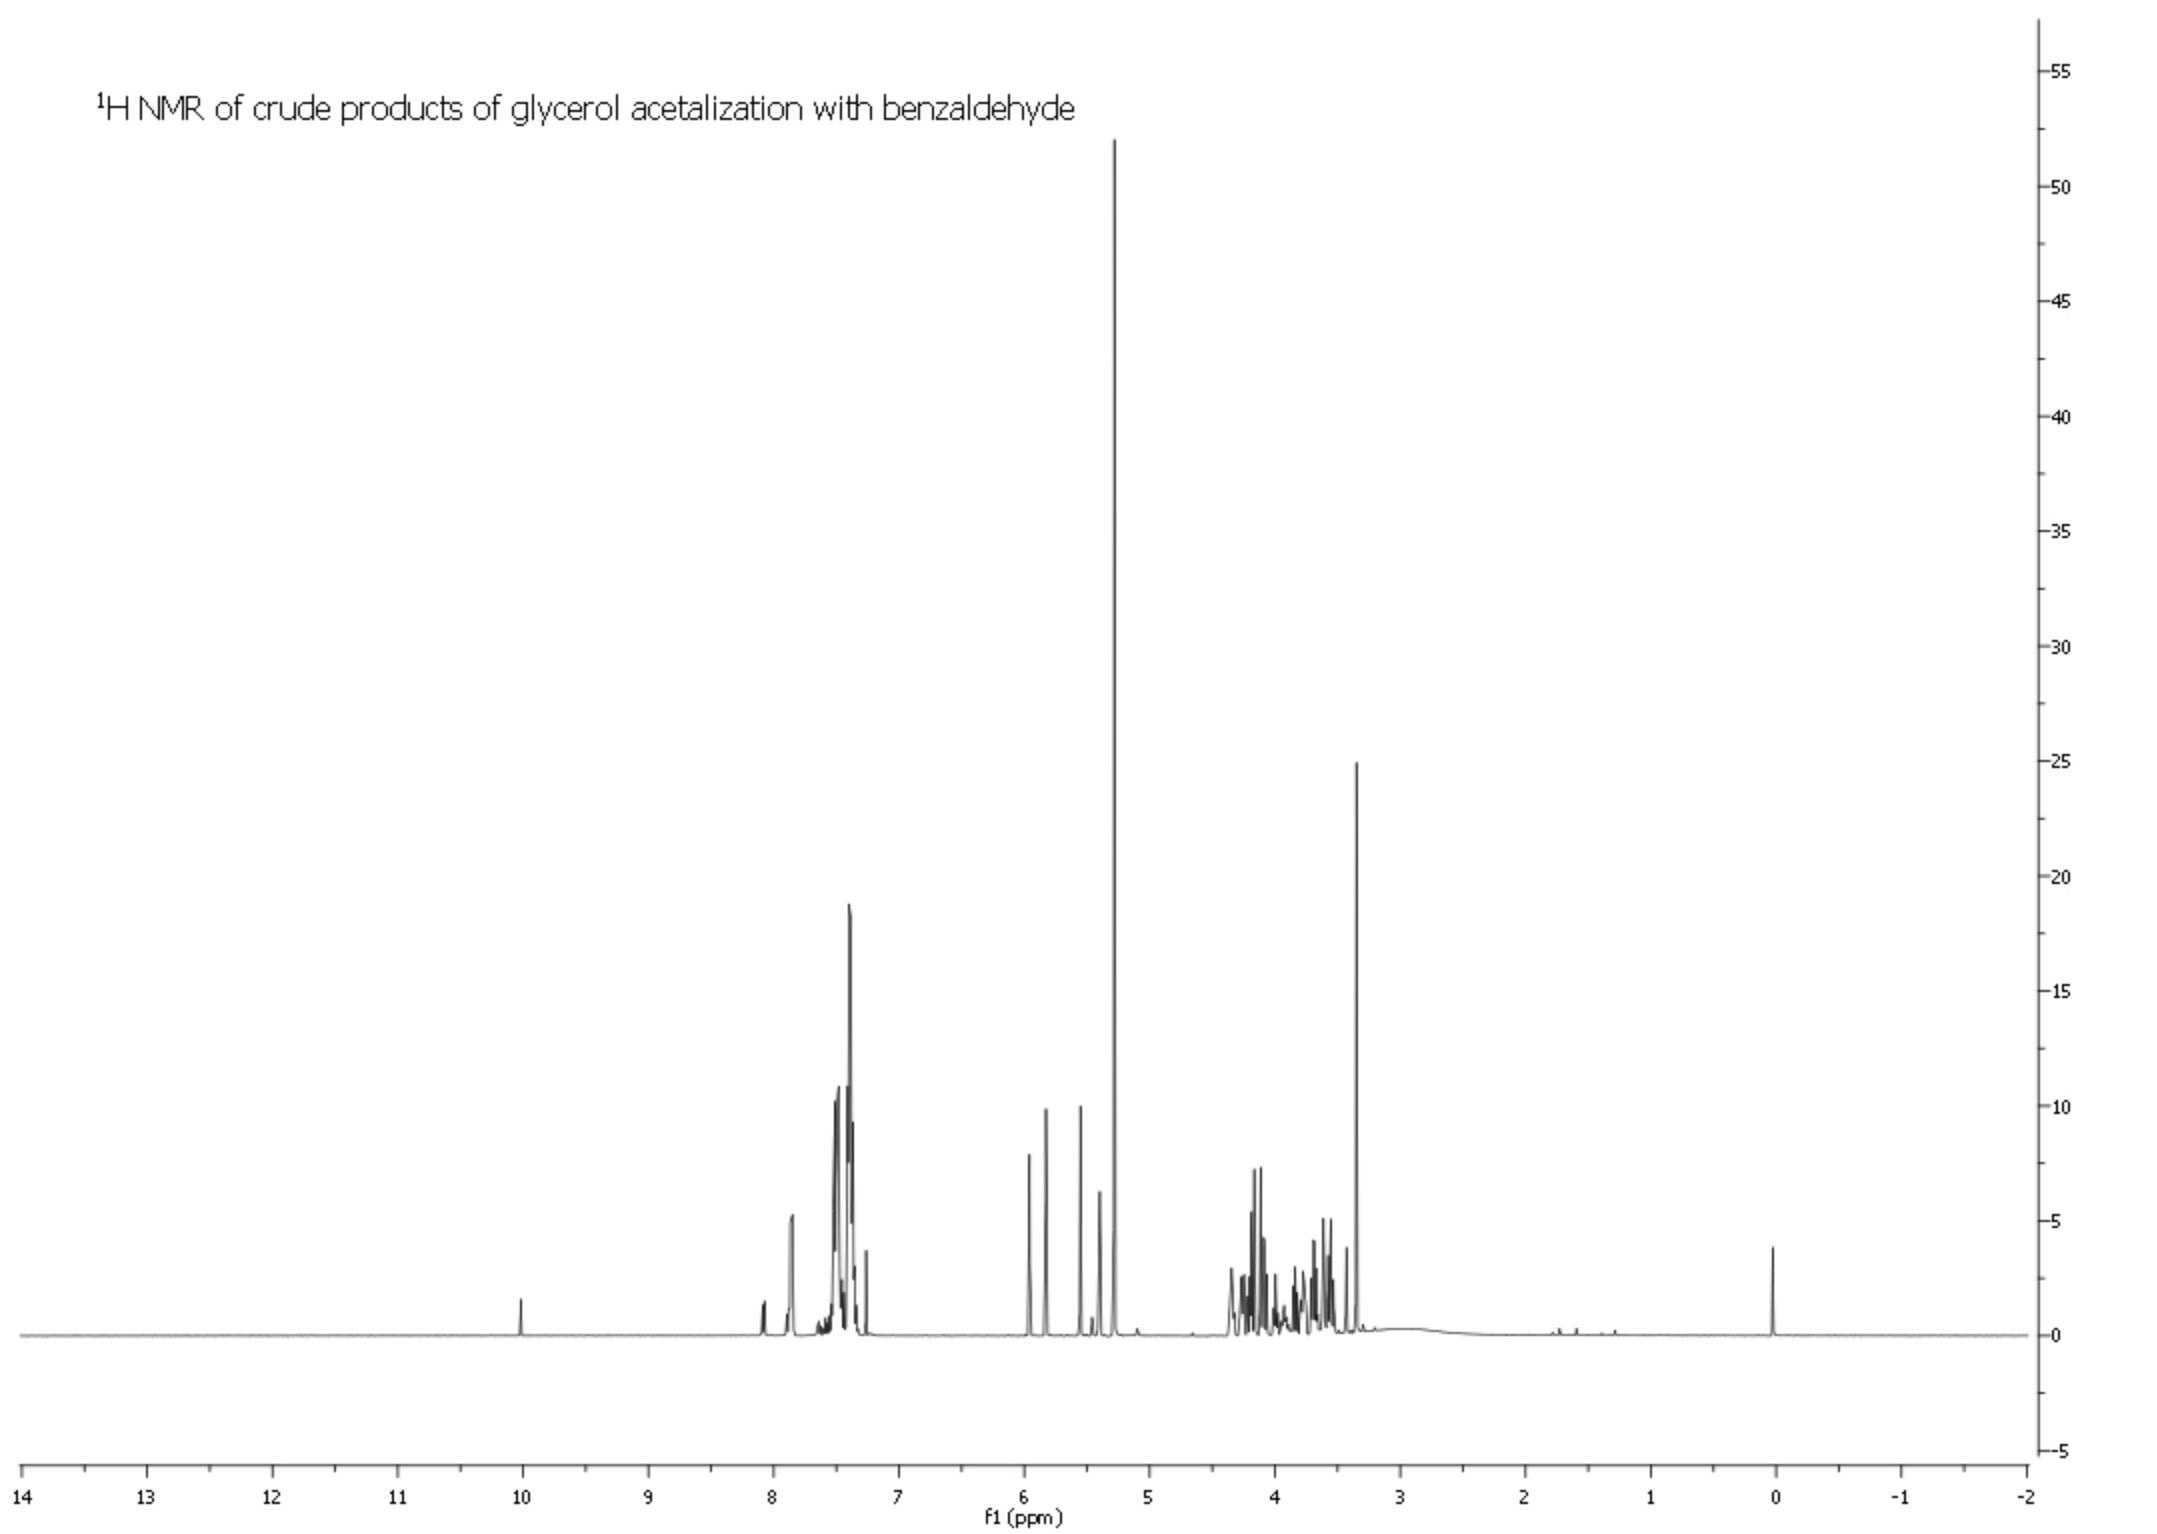

$^1\text{H}$  NMR of crude products of glycerol acetalization with cyclohexanone

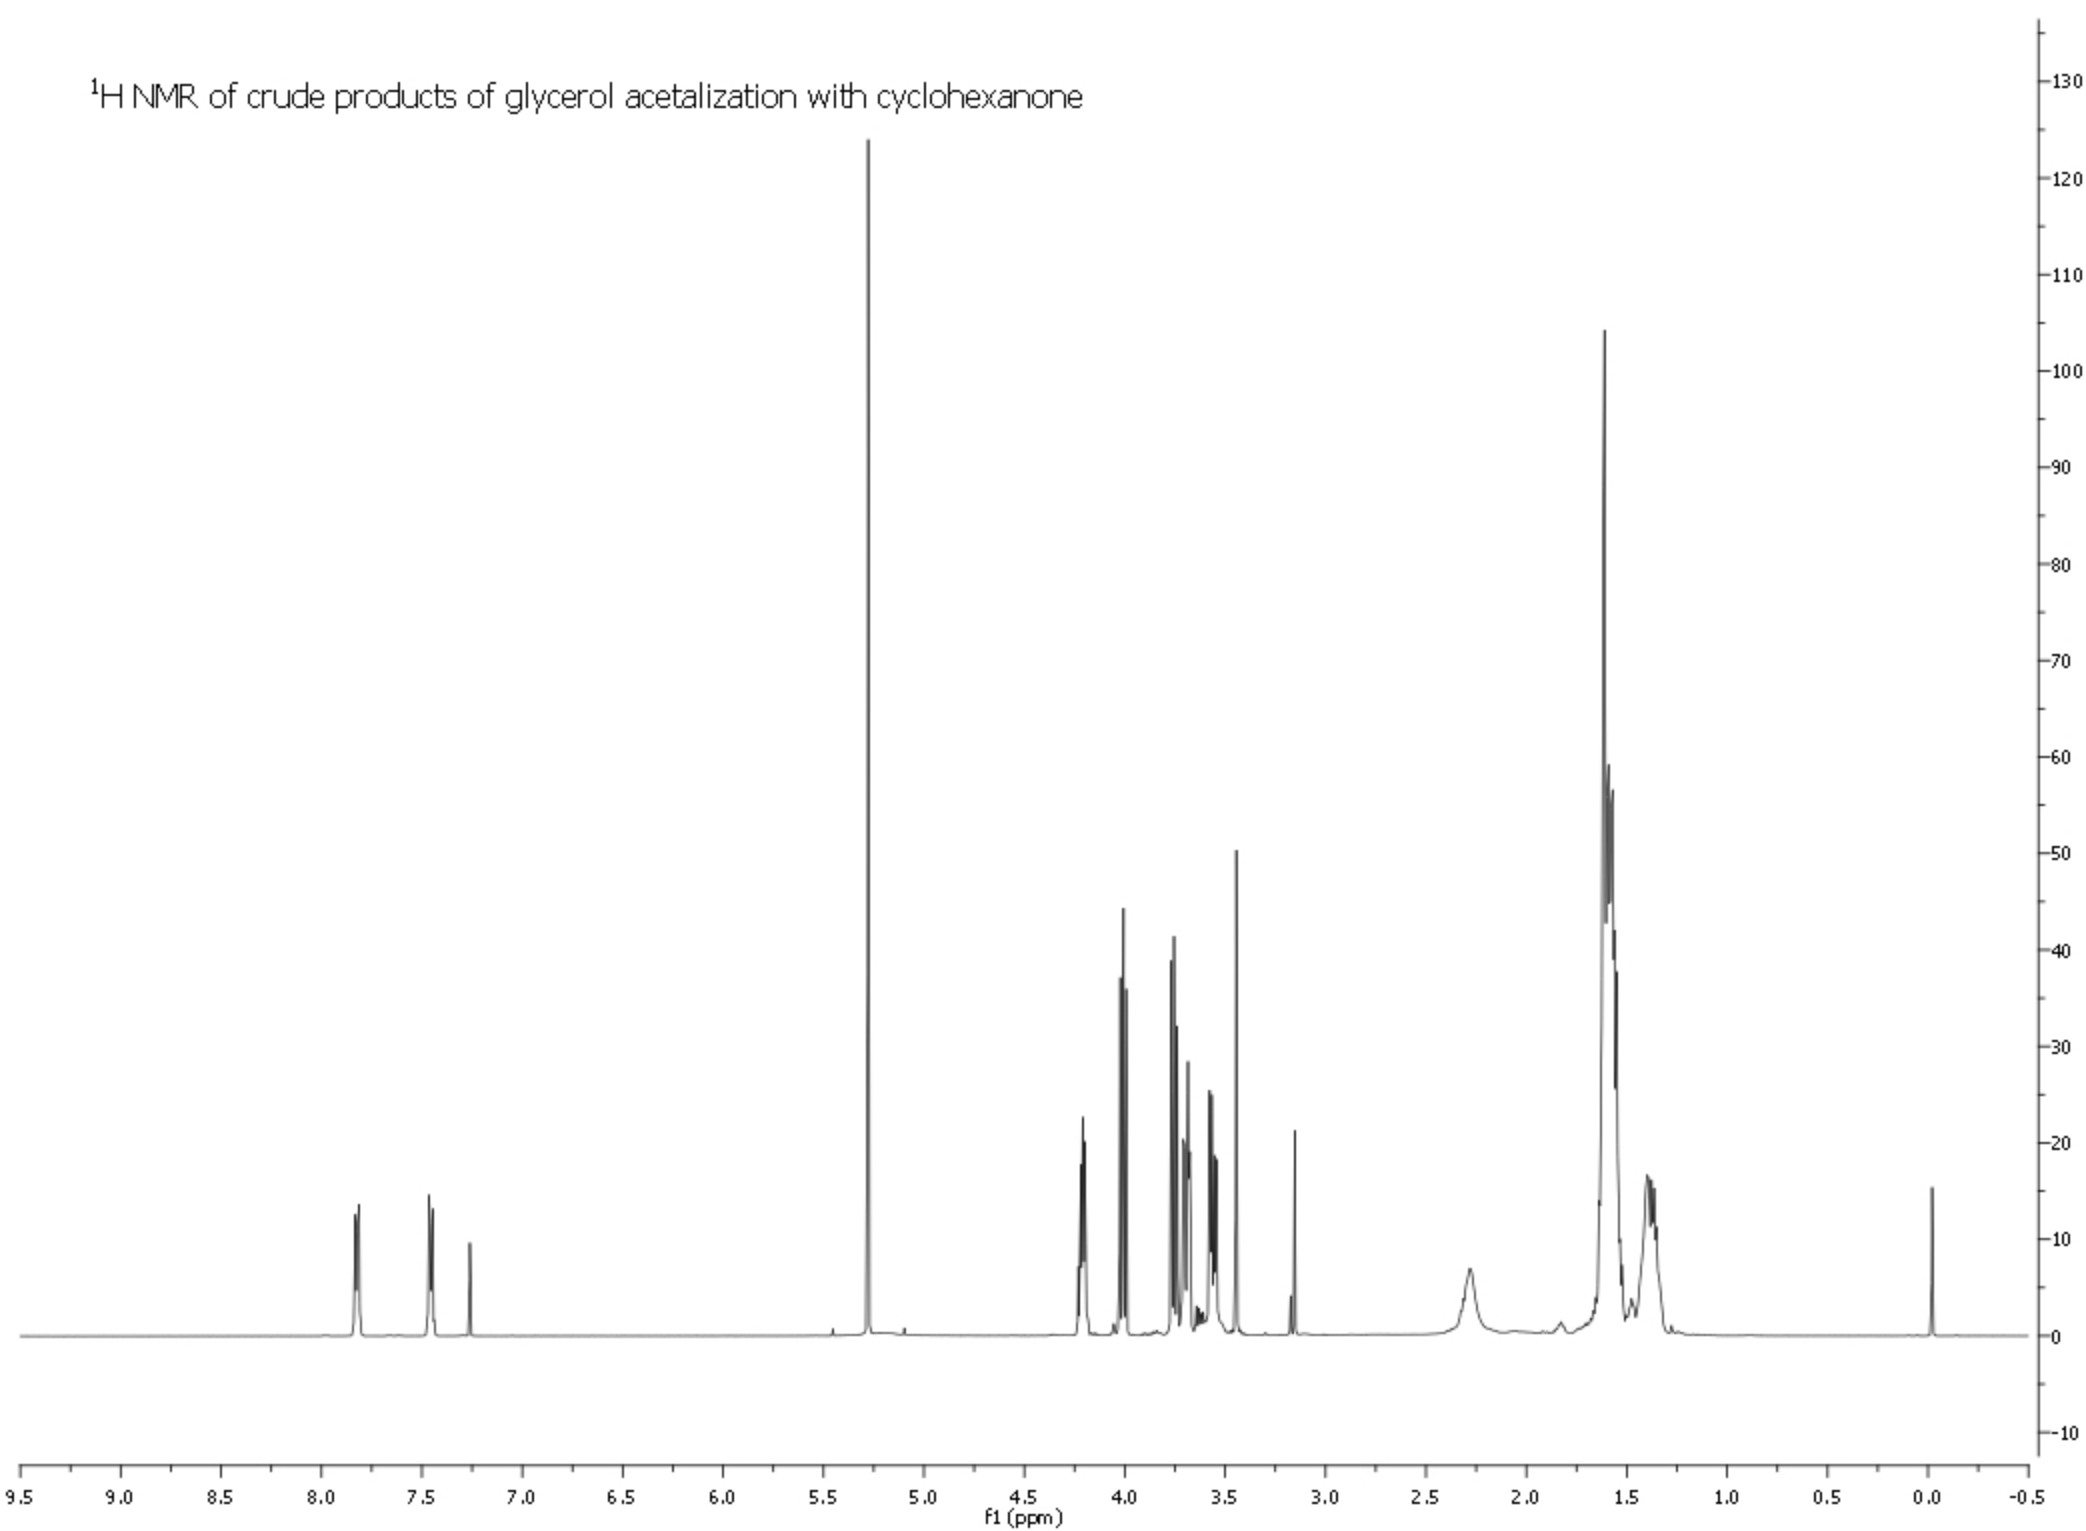

$^1\text{H}$  NMR of crude products of glycerol acetalization with diisopropylacetone

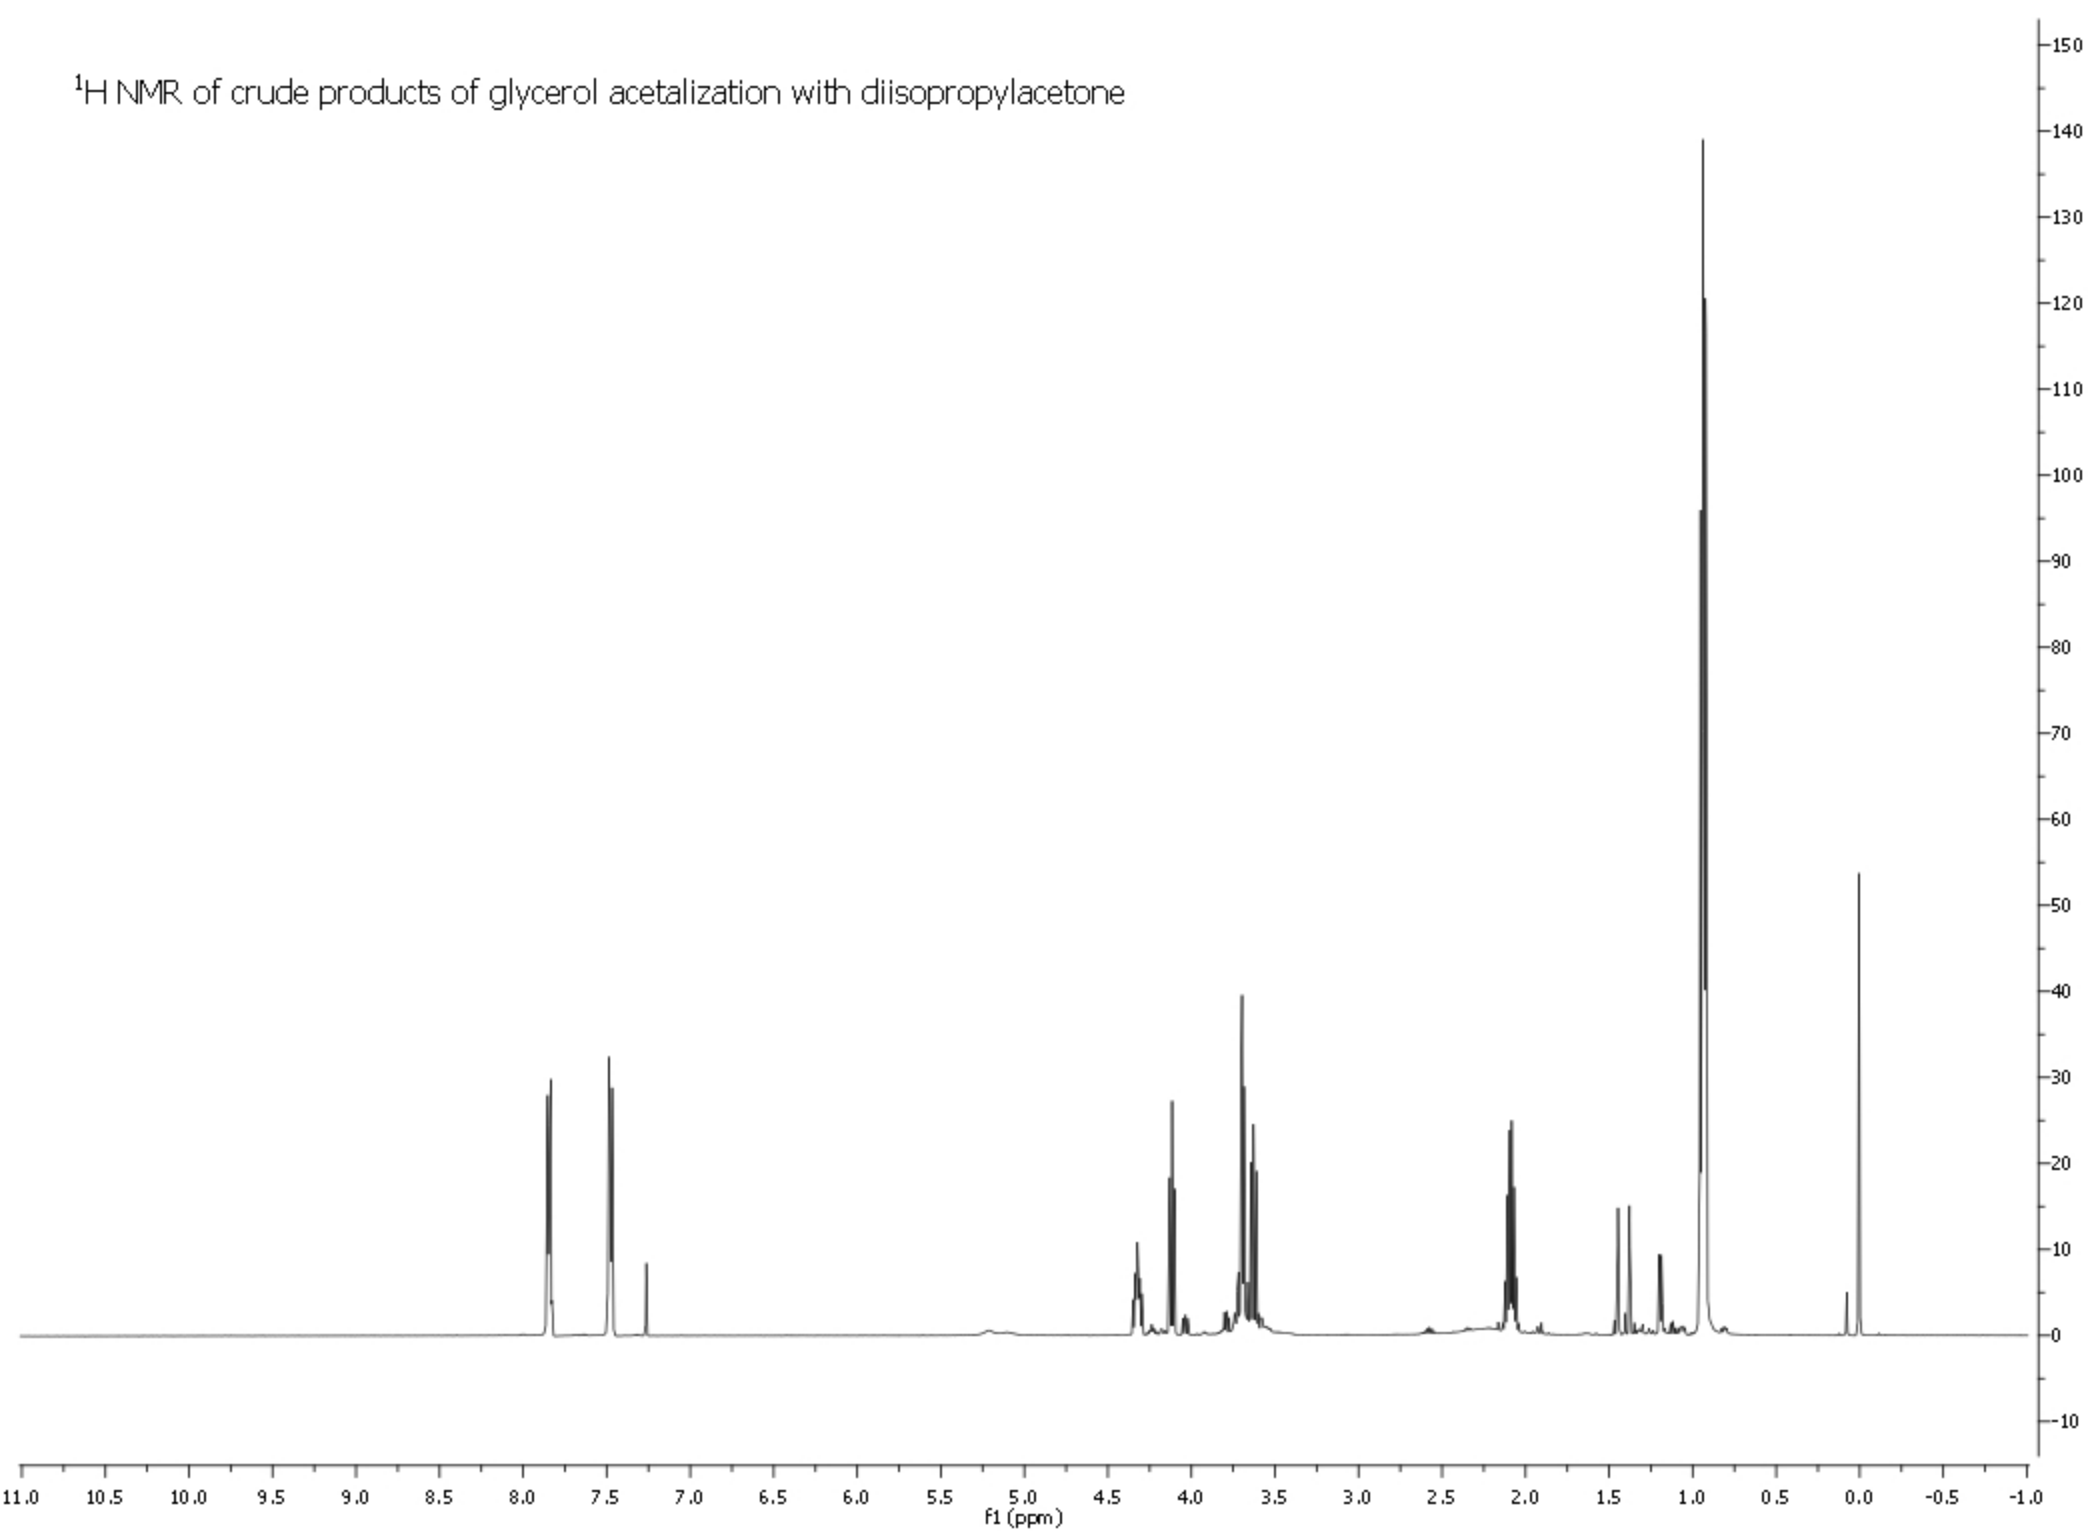

$^1\text{H}$  NMR of crude products of glycerol acetalization with octanal

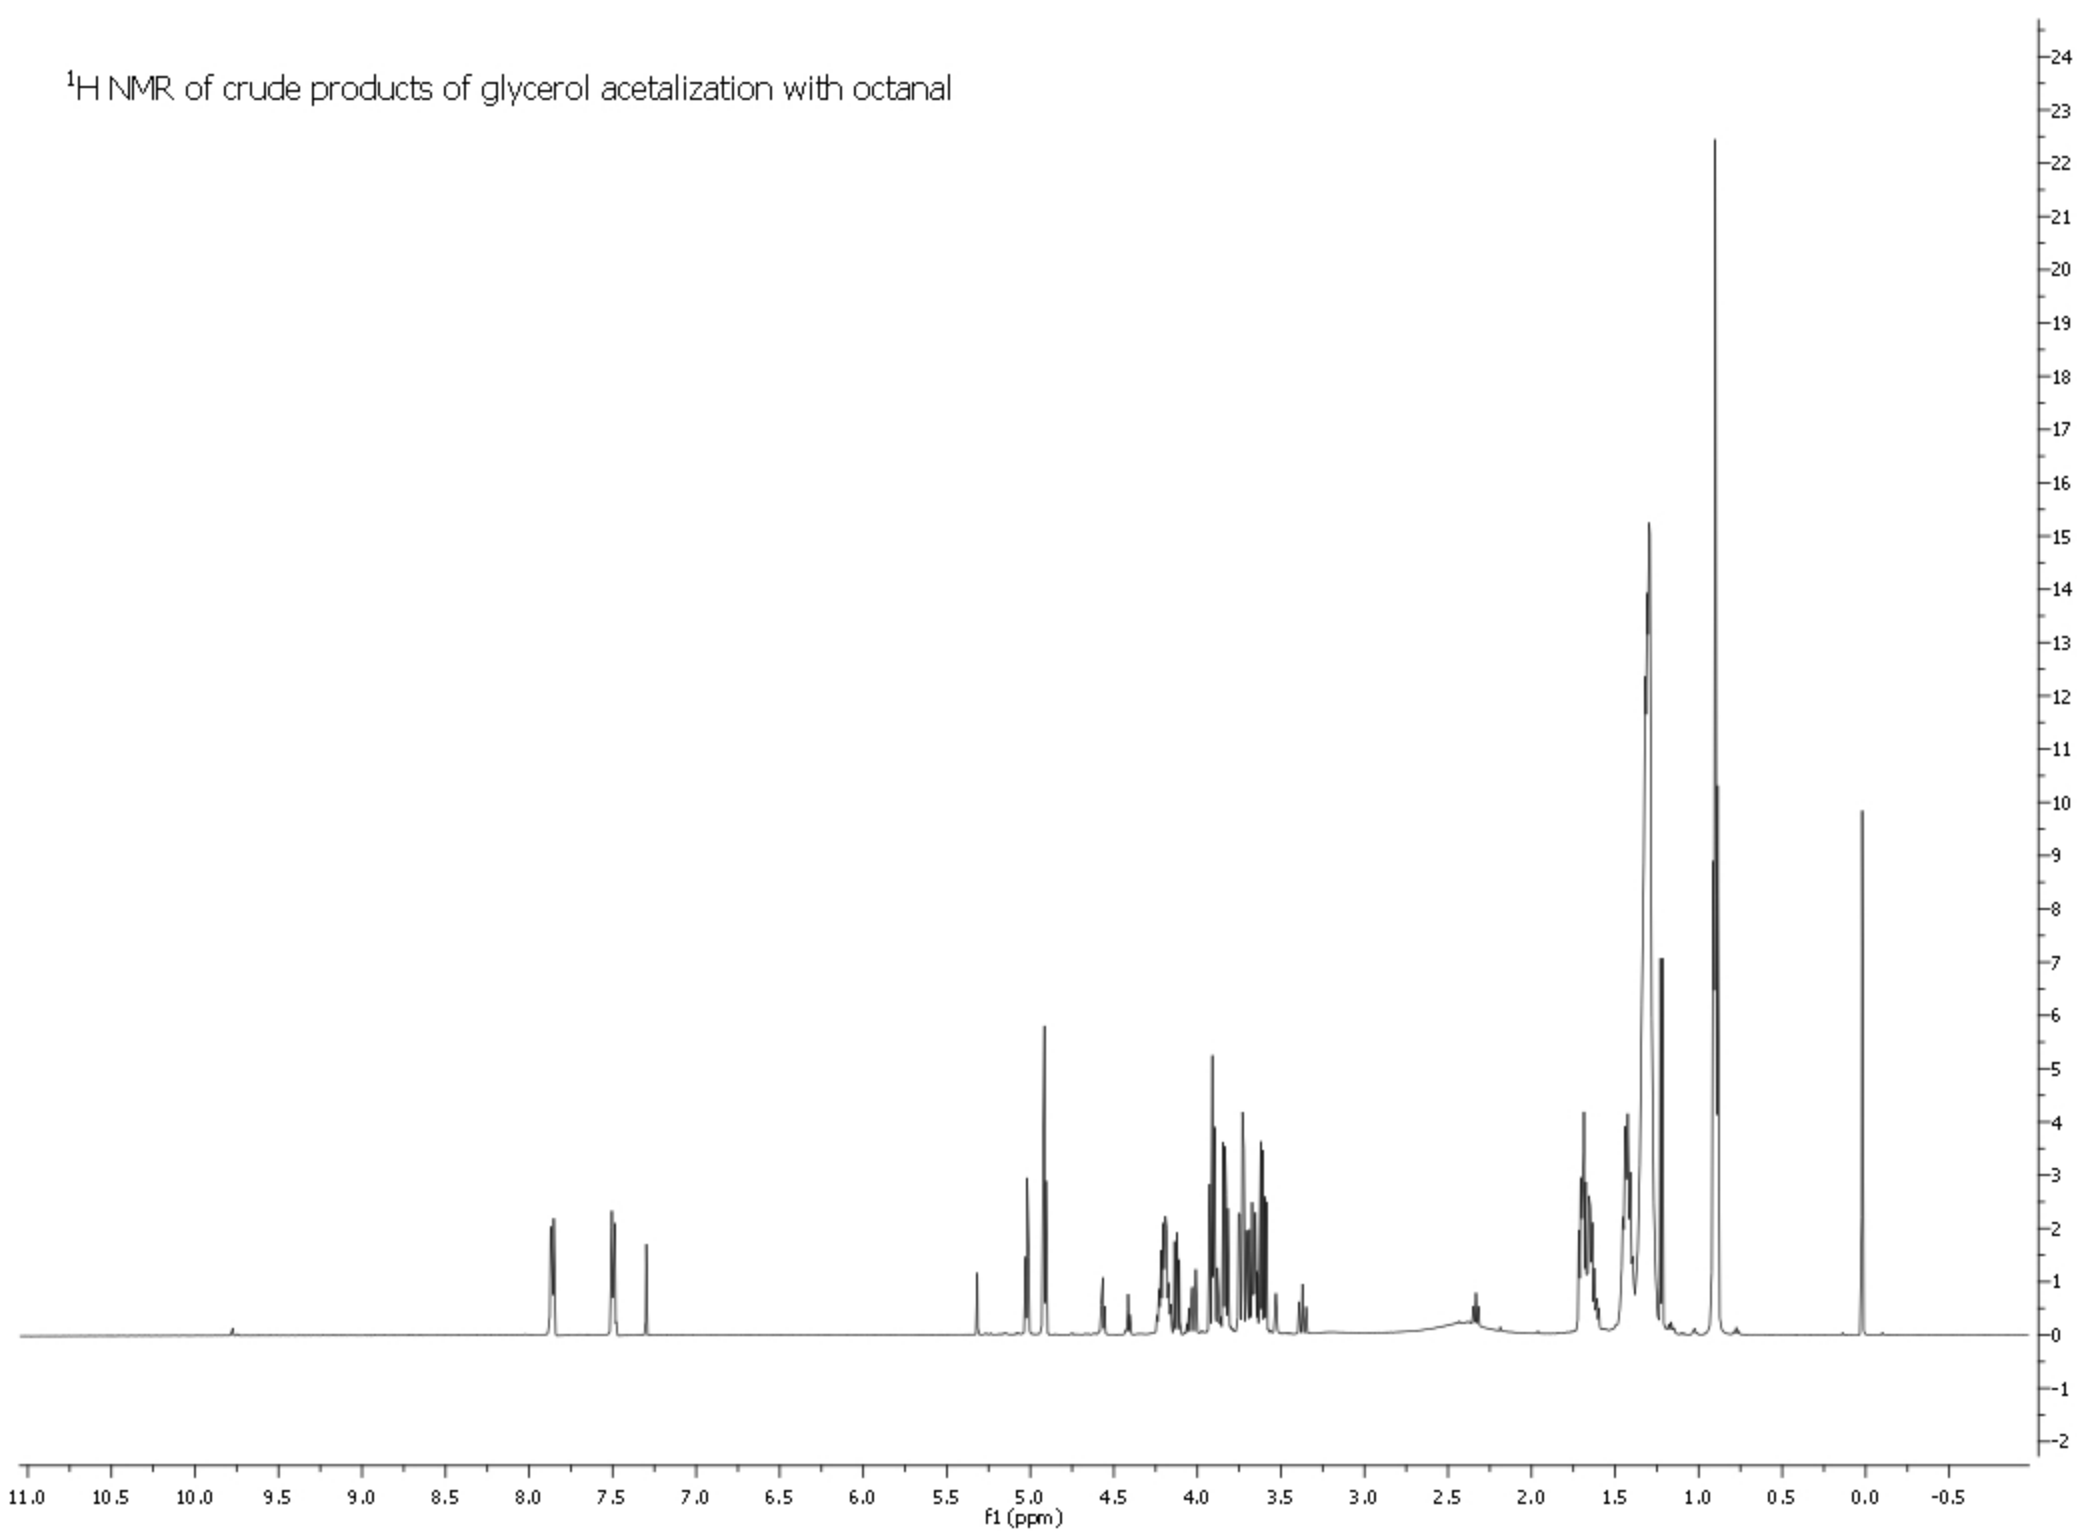

Supplement: c0gc00096e.pdf [file c0gc00096e.pdf]
